# Supplementary material
Source: PubMed Central journal article supplement (PMC3266316)
Supplement: supp_8.1.46_000221_Data_Supplement.pdf [file supp_8.1.46_000221_Data_Supplement.pdf]

Treatment Patterns of Breast Cancer Patients in Georgia Medicaid: Are Patterns Different for BCCPTA Women?

Adams et al

**Data Supplement Table 3: Procedure Codes**

**Data Supplement Table 4: Drug Names and NDC Codes**

**Data Supplement Table 3: Procedure Codes**

| Procedure Category | Included as Definitive Surgery | Procedure Code | Procedure Text                     | Px Type |
|--------------------|--------------------------------|----------------|------------------------------------|---------|
| Lumpectomy         | Yes                            | 19112          | 19112 EXCISE BREAST DUCT FISTULA   | CPT     |
| Lumpectomy         | Yes                            | 19120          | 19120 REMOVAL OF BREAST LESION     | CPT     |
| Lumpectomy         | Yes                            | 19125          | 19125 EXCISION, BREAST LESION      | CPT     |
| Lumpectomy         | Yes                            | 19126          | 19126 EXCISION, ADDL BREAST LESION | CPT     |
| Lumpectomy         | Yes                            | 19160          | 19160 REMOVAL OF BREAST TISSUE     | CPT     |
| Lumpectomy         | Yes                            | 19162          | 19162 REMOVE BREAST TISSUE, NODES  | CPT     |
| Lumpectomy         | Yes                            | 19260          | 19260 REMOVAL OF CHEST WALL LESION | CPT     |
| Lumpectomy         | Yes                            | 8512           | 85.12 OPEN BREAST BIOPSY           | ICD     |
| Lumpectomy         | Yes                            | 8520           | 85.20 BREAST TISSU DESTRUC NOS     | ICD     |
| Lumpectomy         | Yes                            | 8521           | 85.21 LOCAL EXCIS BREAST LES       | ICD     |
| Lumpectomy         | Yes                            | 8522           | 85.22 QUADRANT RESECT BREAST       | ICD     |
| Lumpectomy         | Yes                            | 8524           | 85.24 EXC ECTOPIC BREAST TISSU     | ICD     |
| Mastectomy         | Yes                            | 19180          | 19180 REMOVAL OF BREAST            | CPT     |
| Mastectomy         | Yes                            | 19182          | 19182 REMOVAL OF BREAST            | CPT     |
| Mastectomy         | Yes                            | 19200          | 19200 REMOVAL OF BREAST            | CPT     |
| Mastectomy         | Yes                            | 19220          | 19220 REMOVAL OF BREAST            | CPT     |
| Mastectomy         | Yes                            | 19240          | 19240 REMOVAL OF BREAST            | CPT     |
| Mastectomy         | Yes                            | 8523           | 85.23 SUBTOTAL MASTECTOMY          | ICD     |

|            |     |       |                                                    |     |
|------------|-----|-------|----------------------------------------------------|-----|
| Mastectomy | Yes | 8534  | 85.34 UNILAT SUBQ MAMMECT NEC                      | ICD |
| Mastectomy | Yes | 8536  | 85.36 BILAT SUBQ MAMMECTOM NEC                     | ICD |
| Mastectomy | Yes | 8541  | 85.41 UNILAT SIMPLE MASTECTOMY                     | ICD |
| Mastectomy | Yes | 8542  | 85.42 BILAT SIMPLE MASTECTOMY                      | ICD |
| Mastectomy | Yes | 8543  | 85.43 UNILAT EXTEN SIMP MASTEC                     | ICD |
| Mastectomy | Yes | 8544  | 85.44 BILAT EXTEND SIMP MASTEC                     | ICD |
| Mastectomy | Yes | 8545  | 85.45 UNILAT RADICAL MASTECTOM                     | ICD |
| Mastectomy | Yes | 8547  | 85.47 UNIL EXT RAD MASTECTOMY                      | ICD |
| Surgery    |     | 38305 | 38305 DRAINAGE, LYMPH NODE LESION                  | CPT |
| Surgery    |     | 38308 | 38308 INCISION OF LYMPH CHANNELS                   | CPT |
| Surgery    |     | 38500 | 38500 BIOPSY/REMOVAL, LYMPH NODES                  | CPT |
| Surgery    |     | 38510 | 38510 BIOPSY/REMOVAL, LYMPH NODES                  | CPT |
| Surgery    |     | 38520 | 38520 BIOPSY/REMOVAL, LYMPH NODES                  | CPT |
| Surgery    |     | 38525 | 38525 BIOPSY/REMOVAL, LYMPH NODES                  | CPT |
| Surgery    |     | 38530 | 38530 BIOPSY/REMOVAL, LYMPH NODES                  | CPT |
| Surgery    |     | 38550 | 38550 REMOVAL, NECK/ARMPIT LESION                  | CPT |
| Surgery    |     | 38555 | 38555 REMOVAL, NECK/ARMPIT LESION                  | CPT |
| Surgery    |     | 38740 | 38740 REMOVE ARMPIT LYMPH NODES                    | CPT |
| Surgery    |     | 38745 | 38745 REMOVE ARMPIT LYMPH NODES                    | CPT |
| Surgery    |     | 38790 | 38790 INJECT FOR LYMPHATIC X-RAY                   | CPT |
| Surgery    |     | 38792 | 38792 IDENTIFY SENTINEL NODE                       | CPT |
| Surgery    |     | 38999 | 38999 BLOOD/LYMPH SYSTEM PROCEDURE                 | CPT |
| Surgery    |     | 400   | 40.0 INCIS LYMPHATIC STRUCTUR                      | ICD |
| Surgery    |     | 401   | 40.1 Diagnostic procedures on lymphatic structures | ICD |
| Surgery    |     | 402   | 40.2 Simple excision of lymphatic structure        | ICD |
| Surgery    |     | 403   | 40.3 REGIONAL LYMPH NODE EXC                       | ICD |
| Surgery    |     | 850   | 85.0 MASTOTOMY                                     | ICD |
| Surgery    |     | 4011  | 40.11 LYMPHATIC STRUCT BIOPSY                      | ICD |
| Surgery    |     | 4019  | 40.19 LYMPHATIC DIAG PROC NEC                      | ICD |
| Surgery    |     | 4021  | 40.21 EXCIS DEEP CERVICAL NODE                     | ICD |
| Surgery    |     | 4022  | 40.22 EXCISE INT MAMMARY NODE                      | ICD |
| Surgery    |     | 4023  | 40.23 EXCISE AXILLARY NODE                         | ICD |
| Surgery    |     | 4029  | 40.29 SIMP EXC LYMPH STRUC NEC                     | ICD |

|              |  |       |                                                                                         |     |
|--------------|--|-------|-----------------------------------------------------------------------------------------|-----|
| Surgery      |  | 4051  | 40.51 RAD DISSEC AXILLARY NODE                                                          | ICD |
| Surgery      |  | 4059  | 40.59 RAD NODE DISSECTION NEC                                                           | ICD |
| Surgery      |  | 4131  | 41.31 BONE MARROW BIOPSY                                                                | ICD |
| Chemotherapy |  | 96400 | 96400 CHEMOTHERAPY, SC/IM                                                               | CPT |
| Chemotherapy |  | 96401 | 96401 Chemo. admin, subcutaneous or intramuscular; non-hormonal anti-neoplastic         | CPT |
| Chemotherapy |  | 96402 | 96402 Chemotherapy admin, subcutaneous or intramuscular; hormonal anti-neoplastic       | CPT |
| Chemotherapy |  | 96405 | 96405 INTRALESIONAL CHEMO ADMIN                                                         | CPT |
| Chemotherapy |  | 96408 | 96408 CHEMOTHERAPY, PUSH TECHNIQUE                                                      | CPT |
| Chemotherapy |  | 96409 | 96409 Chemo admin; intravenous, push technique, single or initial substance/drug        | CPT |
| Chemotherapy |  | 96410 | 96410 CHEMOTHERAPY, INFUSION METHOD                                                     | CPT |
| Chemotherapy |  | 96412 | 96412 CHEMO, INFUSE METHOD ADD-ON                                                       | CPT |
| Chemotherapy |  | 96413 | 96413 Chemotherapy admin, intravenous infusion technique; up to 1 hr, single or initial | CPT |
| Chemotherapy |  | 96414 | 96414 CHEMO, INFUSE METHOD ADD-ON                                                       | CPT |
| Chemotherapy |  | 96415 | 96415 Chemo admin, intravenous infusion tech.; each additional hour                     | CPT |
| Chemotherapy |  | 96417 | 96417 Chemo admin, intravenous infusion tech.; each additional sequential infusion      | CPT |
| Chemotherapy |  | 96420 | 96420 CHEMOTHERAPY, PUSH TECHNIQUE                                                      | CPT |
| Chemotherapy |  | 96425 | 96425 CHEMOTHERAPY, INFUSION METHOD                                                     | CPT |
| Chemotherapy |  | 96450 | 96450 CHEMOTHERAPY, INTO CNS                                                            | CPT |
| Chemotherapy |  | 96520 | 96520 PUMP REFILLING, MAINTENANCE                                                       | CPT |
| Chemotherapy |  | 96522 | 96522 Refilling & maint. of implantable pump or reservoir for drug delivery, systemic   | CPT |
| Chemotherapy |  | 96523 | 96523 Irrigation of implanted venous access device for drug delivery systems            | CPT |
| Chemotherapy |  | 96530 | 96530 PUMP REFILLING, MAINTENANCE                                                       | CPT |
| Chemotherapy |  | 96542 | 96542 CHEMOTHERAPY INJECTION                                                            | CPT |
| Chemotherapy |  | 96545 | 96545 PROVIDE CHEMOTHERAPY AGENT                                                        | CPT |
| Chemotherapy |  | 96549 | 96549 CHEMOTHERAPY, UNSPECIFIED                                                         | CPT |
| Chemotherapy |  | J8520 | J8520 Capecitabine, oral, 150 mg                                                        | GA  |
| Chemotherapy |  | J8521 | J8521 Capecitabine, oral, 500 mg                                                        | GA  |
| Chemotherapy |  | J8610 | J8610 Methotrexate oral 2.5 MG                                                          | GA  |
| Chemotherapy |  | J9000 | J9000 Doxorubic HCl 10 MG vl chemo                                                      | GA  |
| Chemotherapy |  | J9001 | J9001 Doxorubicin hcl liposome inj                                                      | GA  |
| Chemotherapy |  | J9010 | J9010 Doxorubicin HCl 50 MG inj                                                         | GA  |

|              |       |                                     |    |
|--------------|-------|-------------------------------------|----|
| Chemotherapy | J9015 | J9015 Aldesleukin/single use vial   | GA |
| Chemotherapy | J9040 | J9040 Bleomycin sulfate injection   | GA |
| Chemotherapy | J9045 | J9045 Carboplatin injection         | GA |
| Chemotherapy | J9060 | J9060 Cisplatin 10 MG injection     | GA |
| Chemotherapy | J9062 | J9062 Cisplatin 50 MG injection     | GA |
| Chemotherapy | J9065 | J9065 Inj cladribine per 1 MG       | GA |
| Chemotherapy | J9070 | J9070 Cyclophosphamide 100 MG inj   | GA |
| Chemotherapy | J9080 | J9080 Cyclophosphamide 200 MG inj   | GA |
| Chemotherapy | J9090 | J9090 Cyclophosphamide 500 MG inj   | GA |
| Chemotherapy | J9091 | J9091 Cyclophosphamide 1.0 grm inj  | GA |
| Chemotherapy | J9092 | J9092 Cyclophosphamide 2.0 grm inj  | GA |
| Chemotherapy | J9093 | J9093 Cyclophosphamide lyophilized  | GA |
| Chemotherapy | J9094 | J9094 Cyclophosphamide lyophilized  | GA |
| Chemotherapy | J9095 | J9095 Cyclophosphamide lyophilized  | GA |
| Chemotherapy | J9096 | J9096 Cyclophosphamide lyophilized  | GA |
| Chemotherapy | J9097 | J9097 Cyclophosphamide lyophilized  | GA |
| Chemotherapy | J9120 | J9120 Dactinomycin 0.5 mg           | GA |
| Chemotherapy | J9130 | J9130 Dacarbazine 10 MG inj         | GA |
| Chemotherapy | J9140 | J9140 Dacarbazine 200 MG inj        | GA |
| Chemotherapy | J9170 | J9170 Docetaxel                     | GA |
| Chemotherapy | J9180 | J9180 ESTRADURIN, 40 MG/2 ML        | GA |
| Chemotherapy | J9181 | J9181 Etoposide 10 MG inj           | GA |
| Chemotherapy | J9182 | J9182 Etoposide 100 MG inj          | GA |
| Chemotherapy | J9185 | J9185 Fludarabine phosphate inj     | GA |
| Chemotherapy | J9190 | J9190 Fluorouracil injection        | GA |
| Chemotherapy | J9201 | J9201 Gemcitabine HCl               | GA |
| Chemotherapy | J9202 | J9202 Goserelin acetate implant     | GA |
| Chemotherapy | J9206 | J9206 Irinotecan injection          | GA |
| Chemotherapy | J9209 | J9209 Mesna injection               | GA |
| Chemotherapy | J9211 | J9211 Idarubicin hcl injection      | GA |
| Chemotherapy | J9213 | J9213 Interferon alfa-2A inj        | GA |
| Chemotherapy | J9214 | J9214 Interferon alfa-2B inj        | GA |
| Chemotherapy | J9217 | J9217 Leuprolide acetate suspension | GA |

|              |       |                                      |    |
|--------------|-------|--------------------------------------|----|
| Chemotherapy | J9218 | J9218 Leuprolide acetate injection   | GA |
| Chemotherapy | J9250 | J9250 Methotrexate sodium 5 mg inj   | GA |
| Chemotherapy | J9260 | J9260 Methotrexate sodium 50 mg inj  | GA |
| Chemotherapy | J9265 | J9265 Paclitaxel injection           | GA |
| Chemotherapy | J9280 | J9280 Mitomycin 5 MG inj             | GA |
| Chemotherapy | J9290 | J9290 Mitomycin 20 MG inj            | GA |
| Chemotherapy | J9293 | J9293 Mitoxantrone hydrochl / 5 MG   | GA |
| Chemotherapy | J9310 | J9310 Rituximab cancer treatment     | GA |
| Chemotherapy | J9330 | J9330 TESTLACTONE, TESLAC , 250 MGM  | GA |
| Chemotherapy | J9340 | J9340 Thiotepa injection             | GA |
| Chemotherapy | J9350 | J9350 Topotecan                      | GA |
| Chemotherapy | J9355 | J9355 Trastuzumab                    | GA |
| Chemotherapy | J9360 | J9360 Vinblastine sulfate inj        | GA |
| Chemotherapy | J9370 | J9370 Vincristine sulfate 1 MG inj   | GA |
| Chemotherapy | J9375 | J9375 Vincristine sulfate 2 MG inj   | GA |
| Chemotherapy | J9390 | J9390 Vinorelbine tartrate/10 mg     | GA |
| Chemotherapy | J9999 | J9999 Chemotherapy drug              | GA |
| Chemotherapy | Q0081 | Q0081 Infusion ther other than chemo | GA |
| Chemotherapy | Q0083 | Q0083 Chemo by other than infusion   | GA |
| Chemotherapy | Q0084 | Q0084 Chemotherapy by infusion       | GA |
| Chemotherapy | Q0085 | Q0085 Chemo by both infusion and oth | GA |
| Chemotherapy | Q0136 | Q0136 Non ESRD epoetin alpha inj     | GA |
| Chemotherapy | Q0137 | Q0137 Dexamethasone acetate 8MG/ML   | GA |
| Chemotherapy | Q0163 | Q0163 Diphenhydramine HCl 50mg       | GA |
| Chemotherapy | Q0164 | Q0164 Prochlorperazine maleate 5mg   | GA |
| Chemotherapy | Q0165 | Q0165 Prochlorperazine maleate10mg   | GA |
| Chemotherapy | Q0166 | Q0166 Granisetron HCl 1 mg oral      | GA |
| Chemotherapy | Q0169 | Q0169 Promethazine HCl 12.5mg oral   | GA |
| Chemotherapy | Q0170 | Q0170 Promethazine HCl 25 mg oral    | GA |
| Chemotherapy | Q0177 | Q0177 Hydroxyzine pamoate 25mg       | GA |
| Chemotherapy | Q0178 | Q0178 Hydroxyzine pamoate 50mg       | GA |
| Chemotherapy | Q0179 | Q0179 Ondansetron HCl 8mg oral       | GA |
| Chemotherapy | Q0180 | Q0180 Dolasetron mesylate oral       | GA |

|              |       |                                                                              |       |
|--------------|-------|------------------------------------------------------------------------------|-------|
| Chemotherapy | Q0181 | Q0181 Unspecified oral anti-emetic                                           | GA    |
| Chemotherapy | G0347 | G0347 Intravenous infusion for therapeutic/diagnostic, initial, up to 1 hour | HCPCS |
| Chemotherapy | G0348 | G0348 Intravenous infusion, each addl. hour                                  | HCPCS |
| Chemotherapy | G0349 | G0349 Intravenous infusion, sequential infusion                              | HCPCS |
| Chemotherapy | G0350 | G0350 Concurrent infusion                                                    | HCPCS |
| Chemotherapy | G0351 | G0351 Therapeutic or diagnostic injection                                    | HCPCS |
| Chemotherapy | G0353 | G0353 Intravenous push, single drug                                          | HCPCS |
| Chemotherapy | G0354 | G0354 Intravenous push, each addl. drug                                      | HCPCS |
| Chemotherapy | G0355 | G0355 Chemotherapy administration, subcutaneous or intramuscular             | HCPCS |
| Chemotherapy | G0356 | G0356 Hormonal antineoplastic                                                | HCPCS |
| Chemotherapy | G0357 | G0357 Intravenous, push technique, single drug                               | HCPCS |
| Chemotherapy | G0358 | G0358 Intravenous, push technique, each addl. Drug                           | HCPCS |
| Chemotherapy | G0359 | G0359 Chemotherapy administration, intravenous infusion, up to 1 hour        | HCPCS |
| Chemotherapy | G0360 | G0360 Chemotherapy administration, intravenous infusion, addl. Hour          | HCPCS |
| Chemotherapy | G0361 | G0361 Initiation of prolonged chemotherapy infusion w/ implant               | HCPCS |
| Chemotherapy | G0362 | G0362 Each addl. sequential infusion, up to 1 hour                           | HCPCS |
| Chemotherapy | G9021 | G9021 Chemotherapy assessment for nausea/vomiting                            | HCPCS |
| Chemotherapy | G9022 | G9022 Chemotherapy assessment for nausea/vomiting                            | HCPCS |
| Chemotherapy | G9023 | G9023 Chemotherapy assessment for nausea/vomiting                            | HCPCS |
| Chemotherapy | G9024 | G9024 Chemotherapy assessment for nausea/vomiting                            | HCPCS |
| Chemotherapy | G9025 | G9025 Chemotherapy assessment for pain                                       | HCPCS |
| Chemotherapy | G9026 | G9026 Chemotherapy assessment for pain                                       | HCPCS |
| Chemotherapy | G9027 | G9027 Chemotherapy assessment for pain                                       | HCPCS |
| Chemotherapy | G9028 | G9028 Chemotherapy assessment for pain                                       | HCPCS |
| Chemotherapy | G9029 | G9029 Chemotherapy assessment for lack of energy                             | HCPCS |
| Chemotherapy | G9030 | G9030 Chemotherapy assessment for lack of energy                             | HCPCS |
| Chemotherapy | G9031 | G9031 Chemotherapy assessment for lack of energy                             | HCPCS |
| Chemotherapy | G9032 | G9032 Chemotherapy assessment for lack of energy                             | HCPCS |
| Chemotherapy | J9035 | J9035 Injection, bevacizumab, 10 mg                                          | HCPCS |
| Chemotherapy | J9051 | J9051                                                                        | HCPCS |
| Chemotherapy | J9098 | J9098 Cytarabine liposome, 10 mg                                             | HCPCS |
| Chemotherapy | J9178 | J9178 Injection, epirubicin HCl                                              | HCPCS |
| Chemotherapy | J9263 | J9263 Injection, oxaliplatin, 0.5 mg                                         | HCPCS |

|              |       |                                                                                         |       |
|--------------|-------|-----------------------------------------------------------------------------------------|-------|
| Chemotherapy | J9264 | J9264 Injection, paclitaxel protein-bound particles, 1 mg                               | HCPCS |
| Chemotherapy | J9335 | J9335                                                                                   | HCPCS |
| Chemotherapy | J9395 | J9395 Injection, fulvestrant                                                            | HCPCS |
| Chemotherapy | J9521 | J9521                                                                                   | HCPCS |
| Chemotherapy | 9925  | 99.25 INJECT CA CHEMOTHER NEC                                                           | ICD   |
| Chemotherapy | 9928  | 99.28 IMMUNOTHERAPY AS ANTINEO                                                          | ICD   |
| Radiation    | 19296 | 19296 Placement of radiotx post balloon catheter into breast for interstitial radio     | CPT   |
| Radiation    | 19297 | 19297 Placement of radiotx post balloon catheter into the breast for interstitial radio | CPT   |
| Radiation    | 77261 | 77261 RADIATION THERAPY PLANNING                                                        | CPT   |
| Radiation    | 77262 | 77262 RADIATION THERAPY PLANNING                                                        | CPT   |
| Radiation    | 77263 | 77263 RADIATION THERAPY PLANNING                                                        | CPT   |
| Radiation    | 77280 | 77280 SET RADIATION THERAPY FIELD                                                       | CPT   |
| Radiation    | 77285 | 77285 SET RADIATION THERAPY FIELD                                                       | CPT   |
| Radiation    | 77290 | 77290 SET RADIATION THERAPY FIELD                                                       | CPT   |
| Radiation    | 77295 | 77295 SET RADIATION THERAPY FIELD                                                       | CPT   |
| Radiation    | 77300 | 77300 RADIATION THERAPY DOSE PLAN                                                       | CPT   |
| Radiation    | 77301 | 77301 RADIOTHERAPY DOS PLAN, IMRT                                                       | CPT   |
| Radiation    | 77305 | 77305 RADIATION THERAPY DOSE PLAN                                                       | CPT   |
| Radiation    | 77310 | 77310 RADIATION THERAPY DOSE PLAN                                                       | CPT   |
| Radiation    | 77315 | 77315 RADIATION THERAPY DOSE PLAN                                                       | CPT   |
| Radiation    | 77321 | 77321 RADIATION THERAPY PORT PLAN                                                       | CPT   |
| Radiation    | 77326 | 77326 RADIATION THERAPY DOSE PLAN                                                       | CPT   |
| Radiation    | 77327 | 77327 RADIATION THERAPY DOSE PLAN                                                       | CPT   |
| Radiation    | 77328 | 77328 RADIATION THERAPY DOSE PLAN                                                       | CPT   |
| Radiation    | 77331 | 77331 SPECIAL RADIATION DOSIMETRY                                                       | CPT   |
| Radiation    | 77332 | 77332 RADIATION TREATMENT AID(S)                                                        | CPT   |
| Radiation    | 77333 | 77333 RADIATION TREATMENT AID(S)                                                        | CPT   |
| Radiation    | 77334 | 77334 RADIATION TREATMENT AID(S)                                                        | CPT   |
| Radiation    | 77336 | 77336 RADIATION PHYSICS CONSULT                                                         | CPT   |
| Radiation    | 77370 | 77370 RADIATION PHYSICS CONSULT                                                         | CPT   |
| Radiation    | 77401 | 77401 RADIATION TREATMENT DELIVERY                                                      | CPT   |
| Radiation    | 77402 | 77402 RADIATION TREATMENT DELIVERY                                                      | CPT   |
| Radiation    | 77403 | 77403 RADIATION TREATMENT DELIVERY                                                      | CPT   |

|                |  |       |                                    |     |
|----------------|--|-------|------------------------------------|-----|
| Radiation      |  | 77404 | 77404 RADIATION TREATMENT DELIVERY | CPT |
| Radiation      |  | 77406 | 77406 RADIATION TREATMENT DELIVERY | CPT |
| Radiation      |  | 77408 | 77408 RADIATION TREATMENT DELIVERY | CPT |
| Radiation      |  | 77409 | 77409 RADIATION TREATMENT DELIVERY | CPT |
| Radiation      |  | 77411 | 77411 RADIATION TREATMENT DELIVERY | CPT |
| Radiation      |  | 77412 | 77412 RADIATION TREATMENT DELIVERY | CPT |
| Radiation      |  | 77413 | 77413 RADIATION TREATMENT DELIVERY | CPT |
| Radiation      |  | 77414 | 77414 RADIATION TREATMENT DELIVERY | CPT |
| Radiation      |  | 77416 | 77416 RADIATION TREATMENT DELIVERY | CPT |
| Radiation      |  | 77417 | 77417 RADIOLOGY PORT FILM(S)       | CPT |
| Radiation      |  | 77418 | 77418 RADIATION TX DELIVERY, IMRT  | CPT |
| Radiation      |  | 77427 | 77427 RADIATION TX MANAGEMENT, X5  | CPT |
| Radiation      |  | 77431 | 77431 RADIATION THERAPY MANAGEMENT | CPT |
| Radiation      |  | 77432 | 77432 STEREOTACTIC RADIATION TRMT  | CPT |
| Radiation      |  | 77470 | 77470 SPECIAL RADIATION TREATMENT  | CPT |
| Radiation      |  | 77499 | 77499 RADIATION THERAPY MANAGEMENT | CPT |
| Radiation      |  | 77750 | 77750 INFUSE RADIOACTIVE MATERIALS | CPT |
| Radiation      |  | 77761 | 77761 APPLY INTRCAV RADIAT SIMPLE  | CPT |
| Radiation      |  | 77762 | 77762 APPLY INTRCAV RADIAT INTERM  | CPT |
| Radiation      |  | 77763 | 77763 APPLY INTRCAV RADIAT COMPL   | CPT |
| Radiation      |  | 77776 | 77776 APPLY INTERSTIT RADIAT SIMPL | CPT |
| Radiation      |  | 77777 | 77777 APPLY INTERSTIT RADIAT INTER | CPT |
| Radiation      |  | 77778 | 77778 APPLY ITERSTIT RADIAT COMPL  | CPT |
| Radiation      |  | 77781 | 77781 HIGH INTENSITY BRACHYTHERAPY | CPT |
| Radiation      |  | 77782 | 77782 HIGH INTENSITY BRACHYTHERAPY | CPT |
| Radiation      |  | 77783 | 77783 HIGH INTENSITY BRACHYTHERAPY | CPT |
| Radiation      |  | 77784 | 77784 HIGH INTENSITY BRACHYTHERAPY | CPT |
| Radiation      |  | 77790 | 77790 RADIATION HANDLING           | CPT |
| Radiation      |  | 77799 | 77799 RADIUM/RADIOISOTOPE THERAPY  | CPT |
| Radiation      |  | 9232  | 92.32 MULTISOURCE RADIOSURGERY     | ICD |
| Reconstruction |  | 19316 | 19316 SUSPENSION OF BREAST         | CPT |
| Reconstruction |  | 19318 | 19318 REDUCTION OF LARGE BREAST    | CPT |
| Reconstruction |  | 19324 | 19324 ENLARGE BREAST               | CPT |



|                |       |                                                                                    |       |
|----------------|-------|------------------------------------------------------------------------------------|-------|
| Reconstruction | 19325 | 19325 ENLARGE BREAST WITH IMPLANT                                                  | CPT   |
| Reconstruction | 19328 | 19328 REMOVAL OF BREAST IMPLANT                                                    | CPT   |
| Reconstruction | 19330 | 19330 REMOVAL OF IMPLANT MATERIAL                                                  | CPT   |
| Reconstruction | 19340 | 19340 IMMEDIATE BREAST PROSTHESIS                                                  | CPT   |
| Reconstruction | 19342 | 19342 DELAYED BREAST PROSTHESIS                                                    | CPT   |
| Reconstruction | 19350 | 19350 Nipple/areola reconstruction                                                 | CPT   |
| Reconstruction | 19355 | 19355 CORRECT INVERTED NIPPLE(S)                                                   | CPT   |
| Reconstruction | 19357 | 19357 Breast reconstruction, immediate or delayed, with tissue expander            | CPT   |
| Reconstruction | 19361 | 19361 Breast reconstruction with latissimus dorsi flap, without prosthetic implant | CPT   |
| Reconstruction | 19364 | 19364 Breast reconstruction with free flap                                         | CPT   |
| Reconstruction | 19366 | 19366 Breast reconstruction with other technique                                   | CPT   |
| Reconstruction | 19367 | 19367 Breast reconstruction with transverse rectus abdominis myocutaneous flap     | CPT   |
| Reconstruction | 19368 | 19368 Breast reconstruction with microvascular anastomosis (supercharging)         | CPT   |
| Reconstruction | 19369 | 19369 Breast reconstruction with transverse rectus abdominis myocutaneous flap     | CPT   |
| Reconstruction | 19370 | 19370 Surgery OF BREAST CAPSULE                                                    | CPT   |
| Reconstruction | 19371 | 19371 REMOVAL OF BREAST CAPSULE                                                    | CPT   |
| Reconstruction | 19380 | 19380 Revision of reconstructed breast                                             | CPT   |
| Reconstruction | 19396 | 19396 DESIGN CUSTOM BREAST IMPLANT                                                 | CPT   |
| Reconstruction | L8000 | L8000 Mastectomy bra                                                               | GA    |
| Reconstruction | L8010 | L8010 Mastectomy sleeve                                                            | GA    |
| Reconstruction | L8015 | L8015 Ext breast prosthesis garment                                                | GA    |
| Reconstruction | L8020 | L8020 Mastectomy form                                                              | GA    |
| Reconstruction | L8030 | L8030 Breast prosthesis silicone/eq                                                | GA    |
| Reconstruction | L8600 | L8600 Implant breast silicone/eq                                                   | GA    |
| Reconstruction | C1789 | C1789 "Prosthesis, breast, imp"                                                    | HCPCS |
| Reconstruction | L8001 | L8001 Breast prosthesis bra & form                                                 | HCPCS |
| Reconstruction | 856   | 85.6 MASTOPEXY                                                                     | ICD   |
| Reconstruction | 857   | 85.7 TOTAL BREAST RECONSTRUCT                                                      | ICD   |
| Reconstruction | 8531  | 85.31 UNILAT REDUCT MAMMOPLAST                                                     | ICD   |
| Reconstruction | 8532  | 85.32 BILAT REDUCT MAMMOPLASTY                                                     | ICD   |
| Reconstruction | 8533  | 85.33 UNIL SUBQ MAMMECT-IMPLNT                                                     | ICD   |
| Reconstruction | 8535  | 85.35 BIL SUBQ MAMMECT-IMPLANT                                                     | ICD   |
| Reconstruction | 8550  | 85.50 AUGMENT MAMMOPLASTY NOS                                                      | ICD   |

|                |       |                                  |     |
|----------------|-------|----------------------------------|-----|
| Reconstruction | 8553  | 85.53 UNILAT BREAST IMPLANT      | ICD |
| Reconstruction | 8554  | 85.54 BILATERAL BREAST IMPLANT   | ICD |
| Reconstruction | 8582  | 85.82 BREAST SPLIT-THICK GRAFT   | ICD |
| Reconstruction | 8583  | 85.83 BREAST FULL-THICK GRAFT    | ICD |
| Reconstruction | 8584  | 85.84 BREAST PEDICLE GRAFT       | ICD |
| Reconstruction | 8585  | 85.85 BREAST MUSCLE FLAP GRAFT   | ICD |
| Reconstruction | 8586  | 85.86 TRANSPOSITION OF NIPPLE    | ICD |
| Reconstruction | 8587  | 85.87 NIPPLE REPAIR NEC          | ICD |
| Reconstruction | 8589  | 85.89 MAMMOPLASTY NEC            | ICD |
| Reconstruction | 8593  | 85.93 BREAST IMPLANT REVISION    | ICD |
| Reconstruction | 8594  | 85.94 BREAST IMPLANT REMOVAL     | ICD |
| Reconstruction | 8595  | 85.95 INSER BREAST TISSU EXPAN   | ICD |
| Reconstruction | 8596  | 85.96 REMOV BREAST TISSU EXPAN   | ICD |
| Reconstruction | 8599  | 85.99 BREAST OPERATION NEC       | ICD |
| Workup         | 19000 | 19000 DRAINAGE OF BREAST LESION  | CPT |
| Workup         | 19001 | 19001 DRAIN BREAST LESION ADD-ON | CPT |
| Workup         | 19020 | 19020 INCISION OF BREAST LESION  | CPT |
| Workup         | 19030 | 19030 INJECTION FOR BREAST X-RAY | CPT |
| Workup         | 19100 | 19100 BX BREAST PERCUT W/O IMAGE | CPT |
| Workup         | 19101 | 19101 BIOPSY OF BREAST, OPEN     | CPT |
| Workup         | 19102 | 19102 BX BREAST PERCUT W/IMAGE   | CPT |
| Workup         | 19103 | 19103 BX BREAST PERCUT W/DEVICE  | CPT |
| Workup         | 19110 | 19110 NIPPLE EXPLORATION         | CPT |
| Workup         | 19290 | 19290 PLACE NEEDLE WIRE, BREAST  | CPT |
| Workup         | 19291 | 19291 PLACE NEEDLE WIRE, BREAST  | CPT |
| Workup         | 19295 | 19295 PLACE BREAST CLIP, PERCUT  | CPT |
| Workup         | 38505 | 38505 NEEDLE BIOPSY, LYMPH NODES | CPT |
| Workup         | 76082 | 76082 Diagnostic mammography     | CPT |
| Workup         | 76083 | 76083 Screening mammography      | CPT |
| Workup         | 76085 | 76085 COMPUTER MAMMOGRAM ADD-ON  | CPT |
| Workup         | 76086 | 76086 X-RAY OF MAMMARY DUCT      | CPT |
| Workup         | 76088 | 76088 X-RAY OF MAMMARY DUCTS     | CPT |
| Workup         | 76090 | 76090 MAMMOGRAM, ONE BREAST      | CPT |

|        |  |       |                                                                                   |       |
|--------|--|-------|-----------------------------------------------------------------------------------|-------|
| Workup |  | 76091 | 76091 MAMMOGRAM, BOTH BREASTS                                                     | CPT   |
| Workup |  | 76092 | 76092 MAMMOGRAM, SCREENING                                                        | CPT   |
| Workup |  | 76093 | 76093 MAGNETIC IMAGE, BREAST                                                      | CPT   |
| Workup |  | 76094 | 76094 MAGNETIC IMAGE, BOTH BREASTS                                                | CPT   |
| Workup |  | 76095 | 76095 STEREOTACTIC BREAST BIOPSY                                                  | CPT   |
| Workup |  | 76096 | 76096 X-RAY OF NEEDLE WIRE, BREAST                                                | CPT   |
| Workup |  | 76645 | 76645 US EXAM, BREAST(S)                                                          | CPT   |
| Workup |  | 78195 | 78195 LYMPH SYSTEM IMAGING                                                        | CPT   |
| Workup |  | G0101 | G0101 CA screen;pelvic/breast exam                                                | GA    |
| Workup |  | C8903 | C8903 "MRI w/cont, breast, uni"                                                   | HCPCS |
| Workup |  | C8904 | C8904 "MRI w/o cont, breast, uni"                                                 | HCPCS |
| Workup |  | C8905 | C8905 "MRI w/o fol w/cont, brst, un"                                              | HCPCS |
| Workup |  | C8908 | C8908 "MRI w/o fol w/cont, breast,"                                               | HCPCS |
| Workup |  | G0202 | G0202 Screeningmammographydigital                                                 | HCPCS |
| Workup |  | G0204 | G0204 Diagnosticmammographydigital                                                | HCPCS |
| Workup |  | G0206 | G0206 Diagnosticmammographydigital                                                | HCPCS |
| Workup |  | G0253 | G0253 PET imaging for breast cancer, staging/restaging                            | HCPCS |
| Workup |  | G0254 | G0254 PET imaging for breast cancer, evaluation or response to treatment          | HCPCS |
| Workup |  | Q3000 | Q3000 Supply of radiopharmaceutical diagnostic imaging agent, rubidium RB82       | HCPCS |
| Workup |  | Q3002 | Q3002 Supply of radiopharmaceutical diagnostic imaging agent, Gallium ga 67       | HCPCS |
| Workup |  | Q3004 | Q3004 Supply of radiopharmaceutical diagnostic imaging agent, Xenon xe 133        | HCPCS |
| Workup |  | Q3005 | Q3005 Supply of radiopharm. diagnostic imaging agent, Technetium tc99m mertiatide | HCPCS |
| Workup |  | Q3009 | Q3009 Supply of radiopharm. diagnostic imaging agent, Technetium tc99m oxidronate | HCPCS |
| Workup |  | Q3010 | Q3010 Supply of radiopharm. diagnostic imaging agent, Technetium tc99mlabeledrbcs | HCPCS |
| Workup |  | 3423  | 34.23 CHEST WALL BIOPSY                                                           | ICD   |
| Workup |  | 8511  | 85.11 CLOSED BREAST BIOPSY                                                        | ICD   |
| Workup |  | 8519  | 85.19 BREAST DX PROCEDURE NEC                                                     | ICD   |
| Workup |  | 8591  | 85.91 ASPIRATION OF BREAST                                                        | ICD   |
| Workup |  | 8737  | 87.37 MAMMOGRAPHY NEC                                                             | ICD   |
| Workup |  | 8891  | 88.91 MRI OF BRAIN & BRAINSTEM                                                    | ICD   |
| Workup |  | 8897  | 88.97 MAGNETIC RES IMAGE UNSP                                                     | ICD   |

|        |  |      |                                |     |
|--------|--|------|--------------------------------|-----|
| Workup |  | 9202 | 92.02 LIVER SCAN/ISOTOPE FUNCT | ICD |
| Workup |  | 9204 | 92.04 GI SCAN & ISOTOPE FUNCT  | ICD |
| Workup |  | 9214 | 92.14 BONE SCAN                | ICD |
| Workup |  | 9215 | 92.15 PULMONARY SCAN           | ICD |
| Workup |  | 9216 | 92.16 LYMPHATIC SYSTEM SCAN    | ICD |
| Workup |  | 9218 | 92.18 TOTAL BODY SCAN          | ICD |
| Workup |  | 9219 | 92.19 SCAN OF OTHER SITES      | ICD |

**Data Supplement Table 4: Drug Names and NDC Codes**

| <b>Trade Name</b>                      | <b>NDC Code</b> | <b>Ingredient Name</b> |
|----------------------------------------|-----------------|------------------------|
| AVASTIN BEVACIZUMAB INJECTION SOLUTION | 50242-*060-01   | BEVACIZUMAB            |
| AVASTIN INJECTION SOLUTION             | 50242-*061-01   | BEVACIZUMAB            |
| XELODA TABLETS                         | 00004-1100-20   | CAPECITABINE           |
| XELODA TABLETS                         | 00004-1101-51   | CAPECITABINE           |
| XELODA TABLETS                         | 00004-1101-50   | CAPECITABINE           |
| XELODA TABLETS                         | 53808-0411-*1   | CAPECITABINE           |
| XELODA TABLETS                         | 54868-4143-*0   | CAPECITABINE           |
| XELODA TABLETS                         | 54868-4143-*1   | CAPECITABINE           |
| XELODA TABLETS                         | 54868-4143-*2   | CAPECITABINE           |
| XELODA TABLETS                         | 54868-4143-*3   | CAPECITABINE           |
| XELODA TABLETS                         | 54868-5260-*6   | CAPECITABINE           |
| XELODA TABLETS                         | 54868-5260-*7   | CAPECITABINE           |
| XELODA TABLETS                         | 54868-5260-*8   | CAPECITABINE           |
| XELODA TABLETS                         | 54868-5260-*9   | CAPECITABINE           |
| XELODA TABLETS                         | 54868-5260-*1   | CAPECITABINE           |
| XELODA TABLETS                         | 54868-5260-*2   | CAPECITABINE           |
| XELODA TABLETS                         | 54868-5260-*3   | CAPECITABINE           |
| XELODA TABLETS                         | 54868-5260-*5   | CAPECITABINE           |
| ERBITUX INJECTION                      | 11014-*977-23   | CETUXIMAB              |
| ERBITUX INJECTION                      | 11014-*978-23   | CETUXIMAB              |
| ERBITUX INJECTION                      | 43284-*012-23   | CETUXIMAB              |
| ERBITUX INJECTION                      | 43284-*013-23   | CETUXIMAB              |

|                                    |               |                           |
|------------------------------------|---------------|---------------------------|
| ERBITUX INJECTION                  | 55154-8959-*3 | CETUXIMAB                 |
| ERBITUX INJECTION                  | 66733-*948-23 | CETUXIMAB                 |
| ERBITUX INJECTION                  | 66733-*958-23 | CETUXIMAB                 |
| TAXOTERE CONCENTRATE FOR INJECTION | 00075-8001-20 | DOCETAXEL ANHYDROUS       |
| TAXOTERE CONCENTRATE FOR INJECTION | 00075-8001-20 | DOCETAXEL ANHYDROUS       |
| TAXOTERE CONCENTRATE FOR INJECTION | 00075-8001-80 | DOCETAXEL ANHYDROUS       |
| TAXOTERE CONCENTRATE FOR INJECTION | 00075-8001-80 | DOCETAXEL ANHYDROUS       |
| TAXOTERE CONCENTRATE FOR INJECTION | 12516-8001-*2 | DOCETAXEL ANHYDROUS       |
| TAXOTERE CONCENTRATE FOR INJECTION | 12516-8001-*2 | DOCETAXEL ANHYDROUS       |
| TAXOTERE CONCENTRATE FOR INJECTION | 12516-8001-*8 | DOCETAXEL ANHYDROUS       |
| TAXOTERE CONCENTRATE FOR INJECTION | 12516-8001-*8 | DOCETAXEL ANHYDROUS       |
| ADRIAMYCIN FOR INJECTION           | 55390-*233-01 | DOXORUBICIN HYDROCHLORIDE |
| ADRIAMYCIN FOR INJECTION           | 55390-*232-10 | DOXORUBICIN HYDROCHLORIDE |
| ADRIAMYCIN FOR INJECTION           | 55390-*231-10 | DOXORUBICIN HYDROCHLORIDE |
| ADRIAMYCIN FOR INJECTION           | 55390-*237-01 | DOXORUBICIN HYDROCHLORIDE |
| ADRIAMYCIN INJECTION               | 55390-*238-01 | DOXORUBICIN HYDROCHLORIDE |
| ADRIAMYCIN INJECTION               | 55390-*236-10 | DOXORUBICIN HYDROCHLORIDE |
| ADRIAMYCIN INJECTION               | 55390-*235-10 | DOXORUBICIN HYDROCHLORIDE |
| ADRIAMYCIN INJECTION               | 10829-*014-01 | DOXORUBICIN HYDROCHLORIDE |
| ADRIAMYCIN INJECTION               | 10829-*013-01 | DOXORUBICIN HYDROCHLORIDE |
| ADRIAMYCIN INJECTION               | 10829-*015-01 | DOXORUBICIN HYDROCHLORIDE |
| ADRIAMYCIN PFS INJECTION           | 62180-1286-*1 | DOXORUBICIN HYDROCHLORIDE |
| ADRIAMYCIN PFS INJECTION           | 62180-1236-*1 | DOXORUBICIN HYDROCHLORIDE |
| ADRIAMYCIN PFS INJECTION           | 62180-1266-*1 | DOXORUBICIN HYDROCHLORIDE |
| ADRIAMYCIN PFS INJECTION           | 62180-1256-*1 | DOXORUBICIN HYDROCHLORIDE |
| ADRIAMYCIN PFS INJECTION           | 62180-1246-*1 | DOXORUBICIN HYDROCHLORIDE |

|                                         |               |                           |
|-----------------------------------------|---------------|---------------------------|
| ADRIAMYCIN RDF INJECTION SOLUTION       | 00013-1096-91 | DOXORUBICIN HYDROCHLORIDE |
| ADRIAMYCIN RDF POWDER FOR INJECTION     | 00013-1086-91 | DOXORUBICIN HYDROCHLORIDE |
| DOXIL INJECTION                         | 17314-9600-*1 | DOXORUBICIN HYDROCHLORIDE |
| DOXIL INJECTION                         | 17314-9600-*2 | DOXORUBICIN HYDROCHLORIDE |
| DOXIL INJECTION                         | 59676-*960-01 | DOXORUBICIN HYDROCHLORIDE |
| DOXIL INJECTION                         | 59676-*960-02 | DOXORUBICIN HYDROCHLORIDE |
| DOXORUBICIN HCL FOR INJECTION           | 10130-*231-10 | DOXORUBICIN HYDROCHLORIDE |
| DOXORUBICIN HCL FOR INJECTION           | 10130-*232-10 | DOXORUBICIN HYDROCHLORIDE |
| DOXORUBICIN HCL FOR INJECTION           | 10130-*233-01 | DOXORUBICIN HYDROCHLORIDE |
| DOXORUBICIN HCL FOR INJECTION           | 10130-*235-10 | DOXORUBICIN HYDROCHLORIDE |
| DOXORUBICIN HCL FOR INJECTION           | 10130-*236-10 | DOXORUBICIN HYDROCHLORIDE |
| DOXORUBICIN HCL FOR INJECTION           | 10130-*237-01 | DOXORUBICIN HYDROCHLORIDE |
| DOXORUBICIN HCL FOR INJECTION           | 10130-*238-01 | DOXORUBICIN HYDROCHLORIDE |
| DOXORUBICIN HCL SOLUTION INJECTION USP  | 63323-*101-61 | DOXORUBICIN HYDROCHLORIDE |
| DOXORUBICIN HCL SOLUTION INJECTION USP  | 63323-*883-30 | DOXORUBICIN HYDROCHLORIDE |
| DOXORUBICIN HCL SOLUTION INJECTION USP  | 63323-*883-05 | DOXORUBICIN HYDROCHLORIDE |
| DOXORUBICIN HCL SOLUTION INJECTION USP  | 63323-*883-10 | DOXORUBICIN HYDROCHLORIDE |
| DOXORUBICIN HCL SOLUTION INJECTION USP  | 65219-*883-05 | DOXORUBICIN HYDROCHLORIDE |
| DOXORUBICIN HCL SOLUTION INJECTION USP  | 65219-*883-10 | DOXORUBICIN HYDROCHLORIDE |
| DOXORUBICIN HCL SOLUTION INJECTION USP  | 65219-*883-30 | DOXORUBICIN HYDROCHLORIDE |
| DOXORUBICIN HYDROCHLORIDE FOR INJECTION | 10019-*920-01 | DOXORUBICIN HYDROCHLORIDE |
| DOXORUBICIN HYDROCHLORIDE FOR INJECTION | 10019-*920-10 | DOXORUBICIN HYDROCHLORIDE |
| DOXORUBICIN HYDROCHLORIDE FOR INJECTION | 10019-*921-02 | DOXORUBICIN HYDROCHLORIDE |
| DOXORUBICIN HYDROCHLORIDE FOR INJECTION | 10019-*921-52 | DOXORUBICIN HYDROCHLORIDE |
| DOXORUBICIN HYDROCHLORIDE FOR INJECTION | 55390-*241-10 | DOXORUBICIN HYDROCHLORIDE |
| DOXORUBICIN HYDROCHLORIDE FOR INJECTION | 55390-*242-10 | DOXORUBICIN HYDROCHLORIDE |

|                                         |               |                           |
|-----------------------------------------|---------------|---------------------------|
| DOXORUBICIN HYDROCHLORIDE FOR INJECTION | 55390-*243-01 | DOXORUBICIN HYDROCHLORIDE |
| DOXORUBICIN HYDROCHLORIDE FOR INJECTION | 57527-*152-13 | DOXORUBICIN HYDROCHLORIDE |
| DOXORUBICIN HYDROCHLORIDE INJECTION     | 00703-5040-01 | DOXORUBICIN HYDROCHLORIDE |
| DOXORUBICIN HYDROCHLORIDE INJECTION     | 00703-5043-03 | DOXORUBICIN HYDROCHLORIDE |
| DOXORUBICIN HYDROCHLORIDE INJECTION     | 00703-5043-01 | DOXORUBICIN HYDROCHLORIDE |
| DOXORUBICIN HYDROCHLORIDE INJECTION     | 00703-5046-01 | DOXORUBICIN HYDROCHLORIDE |
| DOXORUBICIN HYDROCHLORIDE INJECTION     | 55390-*245-10 | DOXORUBICIN HYDROCHLORIDE |
| DOXORUBICIN HYDROCHLORIDE INJECTION     | 55390-*246-10 | DOXORUBICIN HYDROCHLORIDE |
| DOXORUBICIN HYDROCHLORIDE INJECTION     | 55390-*247-01 | DOXORUBICIN HYDROCHLORIDE |
| DOXORUBICIN HYDROCHLORIDE INJECTION     | 55390-*248-01 | DOXORUBICIN HYDROCHLORIDE |
| DOXORUBICIN HYDROCHLORIDE INJECTION     | 62180-5040-*1 | DOXORUBICIN HYDROCHLORIDE |
| DOXORUBICIN HYDROCHLORIDE INJECTION     | 62180-5043-*3 | DOXORUBICIN HYDROCHLORIDE |
| DOXORUBICIN HYDROCHLORIDE INJECTION     | 62180-5046-*1 | DOXORUBICIN HYDROCHLORIDE |
| RUBEX POWDER FOR INJECTION              | 51305-*352-22 | DOXORUBICIN HYDROCHLORIDE |
| RUBEX POWDER FOR INJECTION              | 51305-*353-22 | DOXORUBICIN HYDROCHLORIDE |
| ELLECE INJECTION                        | 62180-5091-*1 | EPIRUBICIN HYDROCHLORIDE  |
| ELLECE INJECTION SOLUTION               | 60715-5091-*1 | EPIRUBICIN HYDROCHLORIDE  |
| ELLECE INJECTION SOLUTION               | 60715-5093-*1 | EPIRUBICIN HYDROCHLORIDE  |
| ELLECE INJECTION SOLUTION               | 62180-5093-*1 | EPIRUBICIN HYDROCHLORIDE  |
| ELLECE SOLUTION INJECTION               | 00009-5091-01 | EPIRUBICIN HYDROCHLORIDE  |
| ELLECE SOLUTION INJECTION               | 00009-5093-01 | EPIRUBICIN HYDROCHLORIDE  |
| EPIRUBICIN HCL INJECTION                | 10130-*074-01 | EPIRUBICIN HYDROCHLORIDE  |
| EPIRUBICIN HCL INJECTION                | 10130-*075-01 | EPIRUBICIN HYDROCHLORIDE  |
| EPIRUBICIN HCL INJECTION                | 55390-*207-01 | EPIRUBICIN HYDROCHLORIDE  |
| EPIRUBICIN HCL INJECTION                | 55390-*208-01 | EPIRUBICIN HYDROCHLORIDE  |
| EPIRUBICIN HYDROCHLORIDE FOR INJECTION  | 54087-*347-35 | EPIRUBICIN HYDROCHLORIDE  |



|                                        |               |                          |
|----------------------------------------|---------------|--------------------------|
| EPIRUBICIN HYDROCHLORIDE FOR INJECTION | 61703-*347-35 | EPIRUBICIN HYDROCHLORIDE |
| EPIRUBICIN HYDROCHLORIDE INJECTION     | 00703-3067-11 | EPIRUBICIN HYDROCHLORIDE |
| EPIRUBICIN HYDROCHLORIDE INJECTION     | 00703-3069-11 | EPIRUBICIN HYDROCHLORIDE |
| EPIRUBICIN HYDROCHLORIDE INJECTION     | 10139-*061-25 | EPIRUBICIN HYDROCHLORIDE |
| EPIRUBICIN HYDROCHLORIDE INJECTION     | 10139-*061-01 | EPIRUBICIN HYDROCHLORIDE |
| EPIRUBICIN HYDROCHLORIDE INJECTION     | 10518-*151-00 | EPIRUBICIN HYDROCHLORIDE |
| EPIRUBICIN HYDROCHLORIDE INJECTION     | 10518-*151-25 | EPIRUBICIN HYDROCHLORIDE |
| EPIRUBICIN HYDROCHLORIDE INJECTION     | 15210-*404-28 | EPIRUBICIN HYDROCHLORIDE |
| EPIRUBICIN HYDROCHLORIDE INJECTION     | 15210-*405-29 | EPIRUBICIN HYDROCHLORIDE |
| EPIRUBICIN HYDROCHLORIDE INJECTION     | 16364-*085-08 | EPIRUBICIN HYDROCHLORIDE |
| EPIRUBICIN HYDROCHLORIDE INJECTION     | 16364-*085-01 | EPIRUBICIN HYDROCHLORIDE |
| EPIRUBICIN HYDROCHLORIDE INJECTION     | 25021-*203-25 | EPIRUBICIN HYDROCHLORIDE |
| EPIRUBICIN HYDROCHLORIDE INJECTION     | 25021-*203-51 | EPIRUBICIN HYDROCHLORIDE |
| EPIRUBICIN HYDROCHLORIDE INJECTION     | 53104-0186-*5 | EPIRUBICIN HYDROCHLORIDE |
| EPIRUBICIN HYDROCHLORIDE INJECTION     | 53104-0186-*0 | EPIRUBICIN HYDROCHLORIDE |
| EPIRUBICIN HYDROCHLORIDE INJECTION     | 54087-*359-01 | EPIRUBICIN HYDROCHLORIDE |
| EPIRUBICIN HYDROCHLORIDE INJECTION     | 54087-*359-02 | EPIRUBICIN HYDROCHLORIDE |
| EPIRUBICIN HYDROCHLORIDE INJECTION     | 54087-*359-91 | EPIRUBICIN HYDROCHLORIDE |
| EPIRUBICIN HYDROCHLORIDE INJECTION     | 54087-*359-92 | EPIRUBICIN HYDROCHLORIDE |
| EPIRUBICIN HYDROCHLORIDE INJECTION     | 54087-*359-59 | EPIRUBICIN HYDROCHLORIDE |
| EPIRUBICIN HYDROCHLORIDE INJECTION     | 54087-*359-93 | EPIRUBICIN HYDROCHLORIDE |
| EPIRUBICIN HYDROCHLORIDE INJECTION     | 59762-5091-*1 | EPIRUBICIN HYDROCHLORIDE |
| EPIRUBICIN HYDROCHLORIDE INJECTION     | 59762-5093-*1 | EPIRUBICIN HYDROCHLORIDE |
| EPIRUBICIN HYDROCHLORIDE INJECTION     | 60715-5090-*1 | EPIRUBICIN HYDROCHLORIDE |
| EPIRUBICIN HYDROCHLORIDE INJECTION     | 60715-5094-*1 | EPIRUBICIN HYDROCHLORIDE |
| EPIRUBICIN HYDROCHLORIDE INJECTION     | 62180-5090-*1 | EPIRUBICIN HYDROCHLORIDE |

|                                             |               |                          |
|---------------------------------------------|---------------|--------------------------|
| EPIRUBICIN HYDROCHLORIDE INJECTION          | 62180-5094-*1 | EPIRUBICIN HYDROCHLORIDE |
| EPIRUBICIN HYDROCHLORIDE INJECTION          | 63323-*151-00 | EPIRUBICIN HYDROCHLORIDE |
| EPIRUBICIN HYDROCHLORIDE INJECTION          | 63323-*151-25 | EPIRUBICIN HYDROCHLORIDE |
| EPIRUBICIN HYDROCHLORIDE INJECTION          | 66758-*042-01 | EPIRUBICIN HYDROCHLORIDE |
| EPIRUBICIN HYDROCHLORIDE INJECTION          | 66758-*042-02 | EPIRUBICIN HYDROCHLORIDE |
| EPIRUBICIN HYDROCHLORIDE INJECTION SOLUTION | 61703-*359-01 | EPIRUBICIN HYDROCHLORIDE |
| EPIRUBICIN HYDROCHLORIDE INJECTION SOLUTION | 61703-*359-02 | EPIRUBICIN HYDROCHLORIDE |
| EPIRUBICIN HYDROCHLORIDE INJECTION SOLUTION | 61703-*359-91 | EPIRUBICIN HYDROCHLORIDE |
| EPIRUBICIN HYDROCHLORIDE INJECTION SOLUTION | 61703-*359-92 | EPIRUBICIN HYDROCHLORIDE |
| EPIRUBICIN HYDROCHLORIDE INJECTION SOLUTION | 61703-*359-59 | EPIRUBICIN HYDROCHLORIDE |
| EPIRUBICIN HYDROCHLORIDE INJECTION SOLUTION | 61703-*359-93 | EPIRUBICIN HYDROCHLORIDE |
| EPIRUBICIN HYDROCHORIDE INJECTION           | 10518-*104-10 | EPIRUBICIN HYDROCHLORIDE |
| EPIRUBICIN HYDROCHORIDE INJECTION           | 10518-*104-11 | EPIRUBICIN HYDROCHLORIDE |
| ADRUCIL INJECTION                           | 00013-1036-91 | FLUOROURACIL             |
| ADRUCIL INJECTION                           | 00013-1046-94 | FLUOROURACIL             |
| ADRUCIL INJECTION                           | 00013-1056-94 | FLUOROURACIL             |
| ADRUCIL INJECTION                           | 00703-3015-13 | FLUOROURACIL             |
| ADRUCIL INJECTION                           | 00703-3015-11 | FLUOROURACIL             |
| ADRUCIL INJECTION                           | 00703-3018-12 | FLUOROURACIL             |
| ADRUCIL INJECTION                           | 00703-3018-11 | FLUOROURACIL             |
| ADRUCIL INJECTION                           | 00703-3019-12 | FLUOROURACIL             |
| ADRUCIL INJECTION                           | 00703-3019-11 | FLUOROURACIL             |
| FLUOROURACIL INJECTION                      | 10019-*950-01 | FLUOROURACIL             |
| FLUOROURACIL INJECTION                      | 10019-*950-02 | FLUOROURACIL             |
| FLUOROURACIL INJECTION                      | 10139-*063-10 | FLUOROURACIL             |
| FLUOROURACIL INJECTION                      | 10139-*063-20 | FLUOROURACIL             |

|                        |               |              |
|------------------------|---------------|--------------|
| FLUOROURACIL INJECTION | 10139-*063-50 | FLUOROURACIL |
| FLUOROURACIL INJECTION | 10139-*063-01 | FLUOROURACIL |
| FLUOROURACIL INJECTION | 10139-*063-11 | FLUOROURACIL |
| FLUOROURACIL INJECTION | 10139-*063-12 | FLUOROURACIL |
| FLUOROURACIL INJECTION | 16364-*084-03 | FLUOROURACIL |
| FLUOROURACIL INJECTION | 16364-*084-05 | FLUOROURACIL |
| FLUOROURACIL INJECTION | 16364-*084-11 | FLUOROURACIL |
| FLUOROURACIL INJECTION | 16364-*084-01 | FLUOROURACIL |
| FLUOROURACIL INJECTION | 16364-*084-33 | FLUOROURACIL |
| FLUOROURACIL INJECTION | 16364-*084-35 | FLUOROURACIL |
| FLUOROURACIL INJECTION | 61703-*409-53 | FLUOROURACIL |
| FLUOROURACIL INJECTION | 61703-*409-32 | FLUOROURACIL |
| FLUOROURACIL INJECTION | 61703-*409-67 | FLUOROURACIL |
| FLUOROURACIL INJECTION | 63323-*117-10 | FLUOROURACIL |
| FLUOROURACIL INJECTION | 63323-*117-10 | FLUOROURACIL |
| FLUOROURACIL INJECTION | 63323-*117-10 | FLUOROURACIL |
| FLUOROURACIL INJECTION | 63323-*117-20 | FLUOROURACIL |
| FLUOROURACIL INJECTION | 63323-*117-51 | FLUOROURACIL |
| FLUOROURACIL INJECTION | 63323-*117-51 | FLUOROURACIL |
| FLUOROURACIL INJECTION | 63323-*117-51 | FLUOROURACIL |
| FLUOROURACIL INJECTION | 63323-*117-61 | FLUOROURACIL |
| FLUOROURACIL INJECTION | 63323-*117-61 | FLUOROURACIL |
| FLUOROURACIL INJECTION | 63323-*117-61 | FLUOROURACIL |
| FLUOROURACIL INJECTION | 63323-*117-65 | FLUOROURACIL |

|                                    |               |                          |
|------------------------------------|---------------|--------------------------|
| FLUOROURACIL INJECTION             | 63323-*117-65 | FLUOROURACIL             |
| FLUOROURACIL INJECTION             | 63323-*117-65 | FLUOROURACIL             |
| FLUOROURACIL INJECTION             | 65219-*117-10 | FLUOROURACIL             |
| FLUOROURACIL INJECTION             | 65219-*117-20 | FLUOROURACIL             |
| FLUOROURACIL INJECTION             | 65219-*117-51 | FLUOROURACIL             |
| FLUOROURACIL INJECTION             | 65219-*117-61 | FLUOROURACIL             |
| FLUOROURACIL INJECTION             | 66758-*044-03 | FLUOROURACIL             |
| FLUOROURACIL INJECTION             | 66758-*044-01 | FLUOROURACIL             |
| FLUOROURACIL INJECTION             | 68842-*044-01 | FLUOROURACIL             |
| FLUOROURACIL INJECTION USP         | 00187-3953-64 | FLUOROURACIL             |
| FLUOROURACIL INJECTION USP         | 64886-*200-01 | FLUOROURACIL             |
| FLUOROURACIL INJECTION USP         | 64886-*200-02 | FLUOROURACIL             |
| CAMPTOSAR INJECTION                | 00009-7529-01 | IRINOTECAN HYDROCHLORIDE |
| CAMPTOSAR INJECTION                | 00009-7529-02 | IRINOTECAN HYDROCHLORIDE |
| IRINOTECAN HCL INJECTION           | 25021-*200-02 | IRINOTECAN HYDROCHLORIDE |
| IRINOTECAN HCL INJECTION           | 25021-*200-05 | IRINOTECAN HYDROCHLORIDE |
| IRINOTECAN HCL INJECTION           | 62756-*937-40 | IRINOTECAN HYDROCHLORIDE |
| IRINOTECAN HCL INJECTION           | 62756-*953-40 | IRINOTECAN HYDROCHLORIDE |
| IRINOTECAN HYDROCHLORIDE INJECTION | 66758-*048-01 | IRINOTECAN HYDROCHLORIDE |
| IRINOTECAN HYDROCHLORIDE INJECTION | 66758-*048-02 | IRINOTECAN HYDROCHLORIDE |
| IRINOTECAN HYDROCHLORIDE INJECTION | 00009-7530-04 | IRINOTECAN HYDROCHLORIDE |
| IRINOTECAN HYDROCHLORIDE INJECTION | 00009-7530-03 | IRINOTECAN HYDROCHLORIDE |
| IRINOTECAN HYDROCHLORIDE INJECTION | 00009-7531-03 | IRINOTECAN HYDROCHLORIDE |
| IRINOTECAN HYDROCHLORIDE INJECTION | 00009-7532-04 | IRINOTECAN HYDROCHLORIDE |
| IRINOTECAN HYDROCHLORIDE INJECTION | 00703-4432-11 | IRINOTECAN HYDROCHLORIDE |
| IRINOTECAN HYDROCHLORIDE INJECTION | 00703-4434-11 | IRINOTECAN HYDROCHLORIDE |

|                                    |               |                          |
|------------------------------------|---------------|--------------------------|
| IRINOTECAN HYDROCHLORIDE INJECTION | 00781-3066-72 | IRINOTECAN HYDROCHLORIDE |
| IRINOTECAN HYDROCHLORIDE INJECTION | 00781-3066-75 | IRINOTECAN HYDROCHLORIDE |
| IRINOTECAN HYDROCHLORIDE INJECTION | 10019-*934-01 | IRINOTECAN HYDROCHLORIDE |
| IRINOTECAN HYDROCHLORIDE INJECTION | 10019-*934-02 | IRINOTECAN HYDROCHLORIDE |
| IRINOTECAN HYDROCHLORIDE INJECTION | 10019-*934-17 | IRINOTECAN HYDROCHLORIDE |
| IRINOTECAN HYDROCHLORIDE INJECTION | 10019-*934-79 | IRINOTECAN HYDROCHLORIDE |
| IRINOTECAN HYDROCHLORIDE INJECTION | 10130-*081-01 | IRINOTECAN HYDROCHLORIDE |
| IRINOTECAN HYDROCHLORIDE INJECTION | 10130-*082-01 | IRINOTECAN HYDROCHLORIDE |
| IRINOTECAN HYDROCHLORIDE INJECTION | 18111-*002-02 | IRINOTECAN HYDROCHLORIDE |
| IRINOTECAN HYDROCHLORIDE INJECTION | 18111-*002-03 | IRINOTECAN HYDROCHLORIDE |
| IRINOTECAN HYDROCHLORIDE INJECTION | 41616-*937-40 | IRINOTECAN HYDROCHLORIDE |
| IRINOTECAN HYDROCHLORIDE INJECTION | 41616-*953-40 | IRINOTECAN HYDROCHLORIDE |
| IRINOTECAN HYDROCHLORIDE INJECTION | 42611-3066-*1 | IRINOTECAN HYDROCHLORIDE |
| IRINOTECAN HYDROCHLORIDE INJECTION | 42611-3066-*2 | IRINOTECAN HYDROCHLORIDE |
| IRINOTECAN HYDROCHLORIDE INJECTION | 47335-*937-40 | IRINOTECAN HYDROCHLORIDE |
| IRINOTECAN HYDROCHLORIDE INJECTION | 47335-*953-40 | IRINOTECAN HYDROCHLORIDE |
| IRINOTECAN HYDROCHLORIDE INJECTION | 52152-*506-02 | IRINOTECAN HYDROCHLORIDE |
| IRINOTECAN HYDROCHLORIDE INJECTION | 52152-*506-03 | IRINOTECAN HYDROCHLORIDE |
| IRINOTECAN HYDROCHLORIDE INJECTION | 53104-0151-*2 | IRINOTECAN HYDROCHLORIDE |
| IRINOTECAN HYDROCHLORIDE INJECTION | 53104-0151-*3 | IRINOTECAN HYDROCHLORIDE |
| IRINOTECAN HYDROCHLORIDE INJECTION | 54087-*349-09 | IRINOTECAN HYDROCHLORIDE |
| IRINOTECAN HYDROCHLORIDE INJECTION | 54087-*349-16 | IRINOTECAN HYDROCHLORIDE |
| IRINOTECAN HYDROCHLORIDE INJECTION | 54087-*349-36 | IRINOTECAN HYDROCHLORIDE |
| IRINOTECAN HYDROCHLORIDE INJECTION | 55390-*295-01 | IRINOTECAN HYDROCHLORIDE |
| IRINOTECAN HYDROCHLORIDE INJECTION | 55390-*296-01 | IRINOTECAN HYDROCHLORIDE |
| IRINOTECAN HYDROCHLORIDE INJECTION | 57884-3001-*2 | IRINOTECAN HYDROCHLORIDE |

|                                             |               |                          |
|---------------------------------------------|---------------|--------------------------|
| IRINOTECAN HYDROCHLORIDE INJECTION          | 57884-3001-*5 | IRINOTECAN HYDROCHLORIDE |
| IRINOTECAN HYDROCHLORIDE INJECTION          | 59762-7529-*2 | IRINOTECAN HYDROCHLORIDE |
| IRINOTECAN HYDROCHLORIDE INJECTION          | 59762-7529-*1 | IRINOTECAN HYDROCHLORIDE |
| IRINOTECAN HYDROCHLORIDE INJECTION          | 61703-*349-09 | IRINOTECAN HYDROCHLORIDE |
| IRINOTECAN HYDROCHLORIDE INJECTION          | 61703-*349-16 | IRINOTECAN HYDROCHLORIDE |
| IRINOTECAN HYDROCHLORIDE INJECTION          | 61703-*349-36 | IRINOTECAN HYDROCHLORIDE |
| IRINOTECAN HYDROCHLORIDE INJECTION          | 63323-*193-05 | IRINOTECAN HYDROCHLORIDE |
| IRINOTECAN HYDROCHLORIDE INJECTION          | 63323-*193-02 | IRINOTECAN HYDROCHLORIDE |
| IRINOTECAN HYDROCHLORIDE INJECTION SOLUTION | 10518-*103-10 | IRINOTECAN HYDROCHLORIDE |
| IRINOTECAN HYDROCHORINDE INJECTION          | 10518-*103-11 | IRINOTECAN HYDROCHLORIDE |
| IRINOTECAN HYDROCHORINDE INJECTION          | 00555-1164-14 | IRINOTECAN HYDROCHLORIDE |
| IRINOTECAN HYDROCHORINDE INJECTION          | 00555-1165-14 | IRINOTECAN HYDROCHLORIDE |
| IRINOTECAN HYDROCHORINDE INJECTION          | 58364-1164-*4 | IRINOTECAN HYDROCHLORIDE |
| IRINOTECAN HYDROCHORINDE INJECTION          | 58364-1165-*4 | IRINOTECAN HYDROCHLORIDE |
| IRINOTECAN HYDROLORIDE INJECTION            | 00703-4437-11 | IRINOTECAN HYDROCHLORIDE |
| LEUCOVORIN CALCIUM FOR INJECTION            | 10130-*051-10 | LEUCOVORIN CALCIUM       |
| LEUCOVORIN CALCIUM FOR INJECTION            | 10130-*052-10 | LEUCOVORIN CALCIUM       |
| LEUCOVORIN CALCIUM FOR INJECTION            | 10130-*053-01 | LEUCOVORIN CALCIUM       |
| LEUCOVORIN CALCIUM FOR INJECTION            | 55390-*051-10 | LEUCOVORIN CALCIUM       |
| LEUCOVORIN CALCIUM FOR INJECTION            | 55390-*052-10 | LEUCOVORIN CALCIUM       |
| LEUCOVORIN CALCIUM FOR INJECTION            | 55390-*053-01 | LEUCOVORIN CALCIUM       |
| LEUCOVORIN CALCIUM FOR INJECTION            | 55390-*054-01 | LEUCOVORIN CALCIUM       |
| LEUCOVORIN CALCIUM FOR INJECTION            | 61703-*410-50 | LEUCOVORIN CALCIUM       |
| LEUCOVORIN CALCIUM FOR INJECTION            | 64886-*120-01 | LEUCOVORIN CALCIUM       |
| LEUCOVORIN CALCIUM FOR INJECTION            | 64886-*121-01 | LEUCOVORIN CALCIUM       |
| LEUCOVORIN CALCIUM INJECTION                | 10130-*009-01 | LEUCOVORIN CALCIUM       |

|                                         |               |                    |
|-----------------------------------------|---------------|--------------------|
| LEUCOVORIN CALCIUM INJECTION            | 10130-*054-01 | LEUCOVORIN CALCIUM |
| LEUCOVORIN CALCIUM INJECTION            | 55390-*009-01 | LEUCOVORIN CALCIUM |
| LEUCOVORIN CALCIUM INJECTION            | 55390-*818-10 | LEUCOVORIN CALCIUM |
| LEUCOVORIN CALCIUM INJECTION            | 55390-*824-01 | LEUCOVORIN CALCIUM |
| LEUCOVORIN CALCIUM INJECTION            | 55390-*825-01 | LEUCOVORIN CALCIUM |
| LEUCOVORIN CALCIUM INJECTION            | 55390-*826-01 | LEUCOVORIN CALCIUM |
| LEUCOVORIN CALCIUM INJECTION USP        | 00703-5138-01 | LEUCOVORIN CALCIUM |
| LEUCOVORIN CALCIUM POWDER FOR INJECTION | 00703-5140-01 | LEUCOVORIN CALCIUM |
| LEUCOVORIN CALCIUM POWDER FOR INJECTION | 00703-5145-01 | LEUCOVORIN CALCIUM |
| LEUCOVORIN CALCIUM POWDER FOR INJECTION | 63323-*711-00 | LEUCOVORIN CALCIUM |
| LEUCOVORIN CALCIUM POWDER FOR INJECTION | 63323-*710-50 | LEUCOVORIN CALCIUM |
| LEUCOVORIN CALCIUM TABLETS              | 00054-4496-13 | LEUCOVORIN CALCIUM |
| LEUCOVORIN CALCIUM TABLETS              | 00054-4496-25 | LEUCOVORIN CALCIUM |
| LEUCOVORIN CALCIUM TABLETS              | 00054-4497-05 | LEUCOVORIN CALCIUM |
| LEUCOVORIN CALCIUM TABLETS              | 00054-4497-10 | LEUCOVORIN CALCIUM |
| LEUCOVORIN CALCIUM TABLETS              | 00054-4498-10 | LEUCOVORIN CALCIUM |
| LEUCOVORIN CALCIUM TABLETS              | 00054-4499-11 | LEUCOVORIN CALCIUM |
| LEUCOVORIN CALCIUM TABLETS              | 00555-0484-02 | LEUCOVORIN CALCIUM |
| LEUCOVORIN CALCIUM TABLETS              | 00555-0484-01 | LEUCOVORIN CALCIUM |
| LEUCOVORIN CALCIUM TABLETS              | 00555-0484-05 | LEUCOVORIN CALCIUM |
| LEUCOVORIN CALCIUM TABLETS              | 00555-0484-18 | LEUCOVORIN CALCIUM |
| LEUCOVORIN CALCIUM TABLETS              | 00555-0485-27 | LEUCOVORIN CALCIUM |
| LEUCOVORIN CALCIUM TABLETS              | 00555-0485-04 | LEUCOVORIN CALCIUM |
| LEUCOVORIN CALCIUM TABLETS              | 00904-2315-60 | LEUCOVORIN CALCIUM |
| LEUCOVORIN CALCIUM TABLETS              | 17856-0484-*2 | LEUCOVORIN CALCIUM |
| LEUCOVORIN CALCIUM TABLETS              | 54868-3310-*0 | LEUCOVORIN CALCIUM |

|                                |               |                    |
|--------------------------------|---------------|--------------------|
| LEUCOVORIN CALCIUM TABLETS     | 54868-3310-*1 | LEUCOVORIN CALCIUM |
| LEUCOVORIN CALCIUM TABLETS     | 54868-3310-*2 | LEUCOVORIN CALCIUM |
| LEUCOVORIN CALCIUM TABLETS     | 54868-3310-*3 | LEUCOVORIN CALCIUM |
| LEUCOVORIN CALCIUM TABLETS     | 54868-3310-*4 | LEUCOVORIN CALCIUM |
| LEUCOVORIN CALCIUM TABLETS USP | 00054-8496-19 | LEUCOVORIN CALCIUM |
| LEUCOVORIN CALCIUM TABLETS USP | 00603-4184-35 | LEUCOVORIN CALCIUM |
| LEUCOVORIN CALCIUM TABLETS USP | 51079-*581-06 | LEUCOVORIN CALCIUM |
| LEUCOVORIN CALCIUM TABLETS USP | 51079-*581-01 | LEUCOVORIN CALCIUM |
| LEUCOVORIN CALCIUM TABLETS USP | 51079-*582-05 | LEUCOVORIN CALCIUM |
| LEUCOVORIN CALCIUM TABLETS USP | 51079-*582-01 | LEUCOVORIN CALCIUM |
| LEUCOVORIN TABLET              | 26053-0026-*1 | LEUCOVORIN CALCIUM |
| LEUCOVORING TABLETS            | 54868-5915-*0 | LEUCOVORIN CALCIUM |
| OXALIPLATIN FOR INJECTION      | 41616-*176-40 | OXALIPLATIN        |
| OXALIPLATIN FOR INJECTION      | 41616-*178-40 | OXALIPLATIN        |
| OXALIPLATIN FOR INJECTION      | 63323-*175-30 | OXALIPLATIN        |
| OXALIPLATIN FOR INJECTION      | 63323-*176-50 | OXALIPLATIN        |
| OXALIPLATIN INJECTION          | 00703-3985-01 | OXALIPLATIN        |
| OXALIPLATIN INJECTION          | 00703-3985-01 | OXALIPLATIN        |
| OXALIPLATIN INJECTION          | 54087-*363-18 | OXALIPLATIN        |
| OXALIPLATIN INJECTION          | 54087-*363-22 | OXALIPLATIN        |
| OXALIPLATIN INJECTION          | 54087-*363-40 | OXALIPLATIN        |
| OXALIPLATIN INJECTION          | 61703-*363-18 | OXALIPLATIN        |
| OXALIPLATIN INJECTION          | 61703-*363-22 | OXALIPLATIN        |
| OXALIPLATIN INJECTION          | 66758-*053-01 | OXALIPLATIN        |
| OXALIPLATIN INJECTION          | 66758-*053-02 | OXALIPLATIN        |
| VECTIBIX INJECTION             | 59703-*956-01 | PANITUMUMAB        |



|                                    |               |             |
|------------------------------------|---------------|-------------|
| VECTIBIX SINGLE USE VIAL           | 55513-*956-01 | PANITUMUMAB |
| VECTIBIX SINGLE USE VIAL INJECTION | 55513-*954-01 | PANITUMUMAB |
| VECTIBIX SINGLE USE VIAL INJECTION | 55513-*955-01 | PANITUMUMAB |
| HERCEPTIN                          | 50242-*056-56 | TRASTUZUMAB |
| HERCEPTIN INJECTION                | 63552-*470-01 | TRASTUZUMAB |
| HERCEPTIN KIT                      | 50242-*134-68 | TRASTUZUMAB |
| ELOXATIN INJECTION                 | 12516-0591-*2 |             |
| ELOXATIN INJECTION                 | 12516-0592-*4 |             |
| ELOXATIN INJECTION                 | 12516-0590-*2 |             |
| ELOXATIN INJECTION                 | 10130-*592-01 |             |
| ELOXATIN INJECTION                 | 10130-*590-10 |             |
| ELOXATIN INJECTION                 | 10130-*591-20 |             |
| ELOXATIN INJECTION                 | 00024-0592-40 |             |
| ELOXATIN INJECTION                 | 00024-0590-10 |             |
| ELOXATIN INJECTION                 | 00024-0596-02 |             |
| ELOXATIN INJECTION                 | 00024-0591-20 |             |
| ERBITUX INJECTION                  | 55154-8959-*3 |             |
| ERBITUX INJECTION                  | 11014-*977-23 |             |
| ERBITUX INJECTION                  | 11014-*978-23 |             |
| ERBITUX INJECTION                  | 66733-*948-23 |             |
| ERBITUX INJECTION                  | 66733-*958-23 |             |
| ERBITUX INJECTION                  | 43284-*012-23 |             |
| ERBITUX INJECTION                  | 43284-*013-23 |             |
| PACLITAXEL INJECTION               | 16729-*098-31 |             |
| PACLITAXEL INJECTION               | 16729-*098-05 |             |
| PACLITAXEL INJECTION               | 16729-*098-11 |             |

|                      |               |  |
|----------------------|---------------|--|
| PACLITAXEL INJECTION | 63323-*763-50 |  |
| PACLITAXEL INJECTION | 63323-*763-16 |  |
| PACLITAXEL INJECTION | 63323-*763-05 |  |
| PACLITAXEL INJECTION | 00555-1984-14 |  |
| PACLITAXEL INJECTION | 00555-1985-14 |  |
| PACLITAXEL INJECTION | 55390-*514-50 |  |
| PACLITAXEL INJECTION | 55390-*514-05 |  |
| PACLITAXEL INJECTION | 55390-*514-20 |  |
| PACLITAXEL INJECTION | 55390-*304-05 |  |
| PACLITAXEL INJECTION | 55390-*304-20 |  |
| PACLITAXEL INJECTION | 55390-*304-50 |  |
| PACLITAXEL INJECTION | 55390-*114-05 |  |
| PACLITAXEL INJECTION | 55390-*114-20 |  |
| PACLITAXEL INJECTION | 55390-*114-50 |  |
| PACLITAXEL INJECTION | 55390-*314-05 |  |
| PACLITAXEL INJECTION | 55390-*314-20 |  |
| PACLITAXEL INJECTION | 55390-*314-50 |  |
| PACLITAXEL INJECTION | 10130-*111-05 |  |
| PACLITAXEL INJECTION | 10130-*111-20 |  |
| PACLITAXEL INJECTION | 10130-*111-50 |  |
| PACLITAXEL INJECTION | 51305-*753-96 |  |
| PACLITAXEL INJECTION | 51305-*754-94 |  |
| PACLITAXEL INJECTION | 51305-*755-31 |  |
| PACLITAXEL INJECTION | 68842-*043-01 |  |
| PACLITAXEL INJECTION | 68842-*043-02 |  |
| PACLITAXEL INJECTION | 68842-*043-03 |  |

|                               |               |  |
|-------------------------------|---------------|--|
| PACLITAXEL INJECTION          | 54087-*754-73 |  |
| PACLITAXEL INJECTION          | 54087-*433-51 |  |
| PACLITAXEL INJECTION          | 54087-*433-52 |  |
| PACLITAXEL INJECTION          | 54087-*433-54 |  |
| PACLITAXEL INJECTION          | 00409-3371-07 |  |
| PACLITAXEL INJECTION          | 00409-3371-08 |  |
| PACLITAXEL INJECTION          | 00409-3371-09 |  |
| PACLITAXEL INJECTION          | 61703-*342-22 |  |
| PACLITAXEL INJECTION          | 61703-*342-50 |  |
| PACLITAXEL INJECTION          | 61703-*342-09 |  |
| PACLITAXEL INJECTION          | 16364-*098-31 |  |
| PACLITAXEL INJECTION          | 16364-*098-05 |  |
| PACLITAXEL INJECTION          | 16364-*098-11 |  |
| PACLITAXEL INJECTION          | 57527-*768-01 |  |
| PACLITAXEL INJECTION          | 57527-*766-01 |  |
| PACLITAXEL INJECTION          | 57527-*767-01 |  |
| PACLITAXEL INJECTION          | 57527-*764-01 |  |
| PACLITAXEL INJECTION          | 58364-1984-*4 |  |
| PACLITAXEL INJECTION          | 00703-4764-01 |  |
| PACLITAXEL INJECTION          | 00703-4768-01 |  |
| PACLITAXEL INJECTION          | 00703-4767-01 |  |
| PACLITAXEL INJECTION          | 00703-4766-01 |  |
| PACLITAXEL INJECTION          | 51079-*961-01 |  |
| PACLITAXEL INJECTION          | 51079-*962-01 |  |
| PACLITAXEL INJECTION          | 51079-*963-01 |  |
| PACLITAXEL INJECTION SOLUTION | 66758-*043-01 |  |

|                               |               |  |
|-------------------------------|---------------|--|
| PACLITAXEL INJECTION SOLUTION | 66758-*043-02 |  |
| PACLITAXEL INJECTION SOLUTION | 66758-*043-03 |  |
| PACLITAXEL INJECTION SOLUTION | 54087-*342-22 |  |
| PACLITAXEL INJECTION SOLUTION | 54087-*342-50 |  |
| PACLITAXEL INJECTION SOLUTION | 54087-*342-09 |  |
| PACLITAXEL INJECTION USP      | 10518-*102-07 |  |
| PACLITAXEL INJECTION USP      | 10518-*102-08 |  |
| PACLITAXEL INJECTION USP      | 10518-*102-09 |  |
| XELODA TABLETS                | 53808-0411-*1 |  |
| XELODA TABLETS                | 00004-1101-51 |  |
| XELODA TABLETS                | 00004-1101-50 |  |
| XELODA TABLETS                | 00004-1100-20 |  |
| XELODA TABLETS                | 54868-4143-*0 |  |
| XELODA TABLETS                | 54868-4143-*1 |  |
| XELODA TABLETS                | 54868-4143-*2 |  |
| XELODA TABLETS                | 54868-4143-*3 |  |
| XELODA TABLETS                | 54868-5260-*6 |  |
| XELODA TABLETS                | 54868-5260-*7 |  |
| XELODA TABLETS                | 54868-5260-*8 |  |
| XELODA TABLETS                | 54868-5260-*9 |  |
| XELODA TABLETS                | 54868-5260-*1 |  |
| XELODA TABLETS                | 54868-5260-*2 |  |
| XELODA TABLETS                | 54868-5260-*3 |  |
| XELODA TABLETS                | 54868-5260-*5 |  |
| CISPLATIN INJECTION           | 63323-*103-51 |  |
| CISPLATIN INJECTION           | 63323-*103-64 |  |

|                                |               |  |
|--------------------------------|---------------|--|
| CISPLATIN INJECTION            | 63323-*103-65 |  |
| CISPLATIN INJECTION            | 63323-*103-91 |  |
| CISPLATIN INJECTION            | 63323-*103-95 |  |
| CISPLATIN INJECTION            | 63323-*103-63 |  |
| CISPLATIN INJECTION            | 65219-*103-51 |  |
| CISPLATIN INJECTION            | 65219-*103-64 |  |
| CISPLATIN INJECTION            | 65219-*103-65 |  |
| CISPLATIN INJECTION            | 10019-*910-57 |  |
| CISPLATIN INJECTION            | 10019-*910-11 |  |
| CISPLATIN INJECTION            | 10019-*910-01 |  |
| CISPLATIN INJECTION            | 10019-*910-02 |  |
| CISPLATIN INJECTION            | 55390-*414-50 |  |
| CISPLATIN INJECTION            | 55390-*414-99 |  |
| CISPLATIN INJECTION            | 55390-*099-01 |  |
| CISPLATIN INJECTION            | 55390-*187-01 |  |
| CISPLATIN INJECTION            | 55390-*112-99 |  |
| CISPLATIN INJECTION            | 55390-*112-50 |  |
| CISPLATIN INJECTION            | 10130-*112-50 |  |
| CISPLATIN INJECTION            | 10130-*112-99 |  |
| CISPLATIN INJECTION            | 57527-*910-57 |  |
| CISPLATIN INJECTION            | 57527-*910-11 |  |
| CISPLATIN INJECTION            | 00703-5748-11 |  |
| CISPLATIN INJECTION            | 00703-5747-11 |  |
| CYCLOPHOSPHAMIDE FOR INJECTION | 10019-*957-01 |  |
| CYCLOPHOSPHAMIDE INJECTION     | 10019-*955-01 |  |
| CYCLOPHOSPHAMIDE FOR INJECTION | 10019-*956-01 |  |

|                                    |               |  |
|------------------------------------|---------------|--|
| CYCLOPHOSPHAMIDE FOR INJECTION     | 67108-3550-*1 |  |
| CYCLOPHOSPHAMIDE FOR INJECTION     | 67108-3551-*7 |  |
| CYCLOPHOSPHAMIDE FOR INJECTION     | 67108-3552-*2 |  |
| CYCLOPHOSPHAMIDE FOR INJECTION USP | 12661-*085-50 |  |
| CYCLOPHOSPHAMIDE TABLETS           | 54868-5218-*0 |  |
| CYCLOPHOSPHAMIDE TABLETS           | 00054-4129-25 |  |
| CYCLOPHOSPHAMIDE TABLETS           | 00054-4130-25 |  |
| CYTOXAN FOR INJECTION              | 67108-0030-*1 |  |
| CYTOXAN FOR INJECTION              | 67108-0020-*4 |  |
| CYTOXAN FOR INJECTION              | 67108-0040-*1 |  |
| CYTOXAN POWDER FOR INJECTION       | 51305-*547-41 |  |
| CYTOXAN POWDER FOR INJECTION       | 51305-*547-12 |  |
| CYTOXAN POWDER FOR INJECTION       | 51305-*548-41 |  |
| CYTOXAN POWDER FOR INJECTION       | 51305-*548-12 |  |
| CYTOXAN POWDER FOR INJECTION       | 51305-*549-41 |  |
| CYTOXAN POWDER FOR INJECTION       | 51305-*549-12 |  |
| CYTOXAN TABLETS                    | 17101-0504-*1 |  |
| CYTOXAN TABLETS                    | 17101-0503-*1 |  |
| CYTOXAN TABLETS                    | 17101-0503-*2 |  |
| CYTOXAN TABLETS                    | 00179-1652-70 |  |
| CYTOXAN TABLETS                    | 00179-1652-71 |  |
| CYTOXAN TABLETS                    | 00179-1652-72 |  |
| CYTOXAN TABLETS                    | 00015-0503-02 |  |
| CYTOXAN TABLETS                    | 00015-0503-02 |  |
| CYTOXAN TABLETS                    | 00015-0503-01 |  |
| CYTOXAN TABLETS                    | 00015-0503-01 |  |

|                               |               |                           |
|-------------------------------|---------------|---------------------------|
| CYTOXAN POWDER FOR INJECTION  | 00015-0547-41 |                           |
| CYTOXAN POWDER FOR INJECTION  | 00015-0547-12 |                           |
| CYTOXAN POWDER FOR INJECTION  | 00015-0549-12 |                           |
| CYTOXAN POWDER FOR INJECTION  | 00015-0549-41 |                           |
| CYTOXAN TABLETS               | 00015-0504-01 |                           |
| CYTOXAN FOR INJECTION         | 00015-0502-41 |                           |
| CYTOXAN POWDER FOR INJECTION  | 00015-0548-41 |                           |
| CYTOXAN POWDER FOR INJECTION  | 00015-0548-12 |                           |
| CYTOXAN INJECTION             | 00015-0505-41 |                           |
| CYTOXAN FOR INJECTION         | 00015-0539-41 |                           |
| CYTOXAN FOR INJECTION         | 00015-0546-41 |                           |
| CYTOXAN TABLETS               | 60491-*170-28 |                           |
| CYTOXAN TABLETS               | 60491-*170-01 |                           |
| GEMZAR INJECTION              | 00002-7501-01 | GEMCITABINE HYDROCHLORIDE |
| GEMZAR INJECTION              | 00002-7502-01 | GEMCITABINE HYDROCHLORIDE |
| HYCAMTIN POWDER FOR INJECTION | 00007-4201-01 |                           |
| HYCAMTIN POWDER FOR INJECTION | 00007-4201-05 |                           |
| HYCAMTIN CAPSULES             | 00007-4205-11 |                           |
| HYCAMTIN CAPSULES             | 00007-4207-11 |                           |
| HYCAMTIN FOR INJECTION        | 61106-4200-*1 |                           |
| HYCAMTIN FOR INJECTION        | 61106-4200-*5 |                           |
| HYCAMTIN FOR INJECTION        | 61106-4201-*1 |                           |
| HYCAMTIN FOR INJECTION        | 61106-4201-*5 |                           |
| IFOSFAMIDE FOR INFECTION      | 63323-*142-10 |                           |
| IFOSFAMIDE FOR INFECTION      | 63323-*142-12 |                           |
| IFOSFAMIDE FOR INFECTION      | 10019-*925-01 |                           |

|                                          |               |                      |
|------------------------------------------|---------------|----------------------|
| IFOSFAMIDE FOR INFECTION                 | 10019-*926-01 |                      |
| IFOSFAMIDE AND MENSNA INJECTION KIT      | 00703-4109-58 |                      |
| IFOSFAMIDE AND MENSNA INJECTION KIT      | 00703-4109-58 |                      |
| IFOSFAMIDE AND MENSNA INJECTION KIT      | 00703-4109-58 |                      |
| IFOSFAMIDE AND MENSNA INJECTION KIT      | 00703-4109-48 |                      |
| IFOSFAMIDE AND MENSNA INJECTION KIT      | 00703-4109-48 |                      |
| IFOSFAMIDE AND MENSNA INJECTION KIT      | 00703-4109-48 |                      |
| IFOSFAMIDE AND MENSNA INJECTION KIT      | 00703-4109-48 |                      |
| IFOSFAMIDE AND MENSNA INJECTION KIT      | 00703-4109-68 |                      |
| IFOSFAMIDE AND MENSNA INJECTION KIT      | 00703-4109-68 |                      |
| IFOSFAMIDE AND MENSNA INJECTION KIT      | 00703-4109-68 |                      |
| IFOSFAMIDE INJECTION MESNA INJECTION KIT | 00703-4100-48 |                      |
| IFOSFAMIDE INJECTION MESNA INJECTION KIT | 00703-4100-48 |                      |
| IFOSFAMIDE INJECTION MESNA INJECTION KIT | 00703-4100-58 |                      |
| IFOSFAMIDE INJECTION MESNA INJECTION KIT | 00703-4100-58 |                      |
| IFOSFAMIDE INJECTION MESNA INJECTION KIT | 00703-4100-68 |                      |
| IFOSFAMIDE INJECTION MESNA INJECTION KIT | 00703-4100-68 |                      |
| IFOSFAMIDE INJECTION                     | 00703-3409-79 |                      |
| IFOSFAMIDE INJECTION                     | 00703-3429-11 |                      |
| IFOSFAMIDE INJECTION                     | 00703-3407-79 |                      |
| IFOSFAMIDE INJECTION                     | 00703-3427-11 |                      |
| IXEMPRA FOR INJECTION                    | 67108-1909-*8 | IXABEPILONE          |
| IXEMPRA FOR INJECTION                    | 67108-1912-*9 | IXABEPILONE          |
| IXEMPRA FOR INJECTION KIT                | 67108-1911-*3 | IXABEPILONE          |
| IXEMPRA KIT                              | 00015-1910-12 | IXABEPILONE          |
| IXEMPRA KIT                              | 00015-1911-13 | IXABEPILONE          |
| TYKERB TABLETS                           | 00173-0752-00 | LAPATINIB DITOSYLATE |



|                               |               |                         |
|-------------------------------|---------------|-------------------------|
| NAVELBINE INJECTION           | 60831-3086-*1 | VINORELBINE TARTRATE    |
| NAVELBINE INJECTION           | 60831-3086-*2 | VINORELBINE TARTRATE    |
| NAVELBINE INJECTION           | 64370-*532-01 | VINORELBINE TARTRATE    |
| NAVELBINE INJECTION           | 64370-*532-02 | VINORELBINE TARTRATE    |
| RHEUMATREX TABLETS            | 67253-*580-00 |                         |
| RHEUMATREX TABLETS            | 67253-*580-42 |                         |
| RHEUMATREX TABLETS            | 67253-*580-43 |                         |
| RHEUMATREX TABLETS            | 67253-*580-44 |                         |
| RHEUMATREX TABLETS            | 67253-*580-45 |                         |
| RHEUMATREX TABLETS            | 67253-*580-46 |                         |
| RHEUMATREX TABLETS            | 67253-*580-99 |                         |
| HYCAMTIN CAPSULES             | 00007-4205-11 | TOPOTECAN HYDROCHLORIDE |
| HYCAMTIN CAPSULES             | 00007-4207-11 | TOPOTECAN HYDROCHLORIDE |
| HYCAMTIN FOR INJECTION        | 61106-4200-*1 | TOPOTECAN HYDROCHLORIDE |
| HYCAMTIN FOR INJECTION        | 61106-4200-*5 | TOPOTECAN HYDROCHLORIDE |
| HYCAMTIN FOR INJECTION        | 61106-4201-*1 | TOPOTECAN HYDROCHLORIDE |
| HYCAMTIN FOR INJECTION        | 61106-4201-*5 | TOPOTECAN HYDROCHLORIDE |
| HYCAMTIN POWDER FOR INJECTION | 00007-4201-01 | TOPOTECAN HYDROCHLORIDE |
| HYCAMTIN POWDER FOR INJECTION | 00007-4201-05 | TOPOTECAN HYDROCHLORIDE |
| TREXALL TABLETS               | 00555-0366-01 |                         |
| TREXALL TABLETS               | 00555-0366-60 |                         |
| TREXALL TABLETS               | 00555-0929-55 |                         |
| TREXALL TABLETS               | 00555-0929-01 |                         |
| TREXALL TABLETS               | 00555-0929-09 |                         |
| TREXALL TABLETS               | 00555-0929-02 |                         |
| TREXALL TABLETS               | 00555-0368-01 |                         |

|                 |               |  |
|-----------------|---------------|--|
| TREXALL TABLETS | 00555-0368-60 |  |
| TREXALL TABLETS | 00555-0945-55 |  |
| TREXALL TABLETS | 00555-0945-01 |  |
| TREXALL TABLETS | 00555-0945-09 |  |
| TREXALL TABLETS | 00555-0945-02 |  |
| TREXALL TABLETS | 00555-0927-60 |  |
| TREXALL TABLETS | 00555-0927-55 |  |
| TREXALL TABLETS | 00555-0927-01 |  |
| TREXALL TABLETS | 00555-0927-09 |  |
| TREXALL TABLETS | 00555-0927-02 |  |
| TREXALL TABLETS | 00555-0367-01 |  |
| TREXALL TABLETS | 00555-0367-60 |  |
| TREXALL TABLETS | 00555-0928-60 |  |
| TREXALL TABLETS | 00555-0928-55 |  |
| TREXALL TABLETS | 00555-0928-01 |  |
| TREXALL TABLETS | 00555-0928-09 |  |
| TREXALL TABLETS | 00555-0928-02 |  |
| TREXALL TABLETS | 00555-0369-01 |  |
| TREXALL TABLETS | 00555-0369-60 |  |
| TREXALL TABLETS | 51285-*369-01 |  |
| TREXALL TABLETS | 51285-*369-60 |  |
| TREXALL TABLETS | 51285-*366-01 |  |
| TREXALL TABLETS | 51285-*366-60 |  |
| TREXALL TABLETS | 51285-*368-01 |  |
| TREXALL TABLETS | 51285-*368-60 |  |
| TREXALL TABLETS | 51285-*367-01 |  |

|                                 |               |                      |
|---------------------------------|---------------|----------------------|
| TREXALL TABLETS                 | 51285-*367-60 |                      |
| VINORELBINE INJECTION           | 00008-0045-01 | VINORELBINE TARTRATE |
| VINORELBINE INJECTION           | 00008-0045-02 | VINORELBINE TARTRATE |
| VINORELBINE INJECTION           | 25021-*204-01 | VINORELBINE TARTRATE |
| VINORELBINE INJECTION           | 25021-*204-05 | VINORELBINE TARTRATE |
| VINORELBINE INJECTION           | 55390-*069-01 | VINORELBINE TARTRATE |
| VINORELBINE INJECTION           | 55390-*070-01 | VINORELBINE TARTRATE |
| VINORELBINE INJECTION           | 55390-*268-01 | VINORELBINE TARTRATE |
| VINORELBINE INJECTION           | 66758-*045-01 | VINORELBINE TARTRATE |
| VINORELBINE INJECTION           | 66758-*045-02 | VINORELBINE TARTRATE |
| VINORELBINE INJECTION           | 68842-*045-01 | VINORELBINE TARTRATE |
| VINORELBINE INJECTION           | 68842-*045-02 | VINORELBINE TARTRATE |
| VINORELBINE TARTARATE INJECTION | 10130-*069-01 | VINORELBINE TARTRATE |
| VINORELBINE TARTARATE INJECTION | 55390-*267-01 | VINORELBINE TARTRATE |
| VINORELBINE TARTARATE INJECTION | 00703-4182-01 | VINORELBINE TARTRATE |
| VINORELBINE TARTARATE INJECTION | 54087-*341-06 | VINORELBINE TARTRATE |
| VINORELBINE TARTARATE INJECTION | 54087-*341-09 | VINORELBINE TARTRATE |
| VINORELBINE TARTARATE INJECTION | 61703-*341-06 | VINORELBINE TARTRATE |
| VINORELBINE TARTARATE INJECTION | 61703-*341-09 | VINORELBINE TARTRATE |
| VINORELBINE TARTARATE INJECTION | 63323-*148-01 | VINORELBINE TARTRATE |
| VINORELBINE TARTARATE INJECTION | 63323-*148-05 | VINORELBINE TARTRATE |
| VINORELBINE TARTARATE INJECTION | 64370-*210-03 | VINORELBINE TARTRATE |
| VINORELBINE TARTARATE INJECTION | 64370-*250-01 | VINORELBINE TARTRATE |
| ARIMIDEX TABLETS                | 00310-0201-30 | ANASTRAZOLE          |
| ARIMIDEX TABLETS                | 00310-0201-97 | ANASTRAZOLE          |
| ARIMIDEX TABLETS                | 00179-1889-70 | ANASTRAZOLE          |

|                              |               |             |
|------------------------------|---------------|-------------|
| ARIMIDEX TABLETS             | 00179-1889-71 | ANASTRAZOLE |
| ARIMIDEX TABLETS             | 00179-1889-72 | ANASTRAZOLE |
| ARIMIDEX TABLETS             | 35356-*270-30 | ANASTRAZOLE |
| ARIMIDEX TABLETS             | 51129-1122-*1 | ANASTRAZOLE |
| ARIMIDEX FILM COATED TABLETS | 54868-5000-*0 | ANASTRAZOLE |
| AROMASIN TABLETS             | 10829-7663-*4 | EXEMESTANE  |
| AROMASIN TABLETS             | 10829-7663-*6 | EXEMESTANE  |
| AROMASIN TABLETS             | 00009-5206-01 | EXEMESTANE  |
| AROMASIN TABLETS             | 00009-7663-04 | EXEMESTANE  |
| AROMASIN TABLETS             | 54868-5261-*0 | EXEMESTANE  |
| FEMARA TABLETS               | 00179-1657-70 | LETROZOLE   |
| FEMARA TABLETS               | 00179-1657-71 | LETROZOLE   |
| FEMARA TABLETS               | 00179-1657-72 | LETROZOLE   |
| FEMARA TABLETS               | 17088-1004-*1 | LETROZOLE   |
| FEMARA TABLETS               | 00078-0249-15 | LETROZOLE   |
| FEMARA TABLETS               | 54868-4151-*0 | LETROZOLE   |
| MEGACE ES ORAL SUSPENSION    | 54569-5858-*0 | MEGACE      |
| MEGACE ES ORAL SUSPENSION    | 17856-0949-*2 | MEGACE      |
| MEGACE TABLETS               | 15548-*595-01 | MEGACE      |
| MEGACE TABLETS               | 15548-*596-41 | MEGACE      |
| MEGACE TABLETS               | 15548-*596-46 | MEGACE      |
| MEGACE TABLETS               | 15548-*596-45 | MEGACE      |
| MEGACE SUSPENSION ORAL       | 00015-0508-93 | MEGACE      |
| MEGACE SUSPENSION ORAL       | 00015-0508-42 | MEGACE      |
| MEGACE ES ORAL SUSPENSION    | 49884-*949-69 | MEGACE      |
| MEGACE TABLETS               | 60491-*396-30 | MEGACE      |

|                                    |               |          |
|------------------------------------|---------------|----------|
| MEGACE TABLETS                     | 60491-*396-60 | MEGACE   |
| MEGACE ES SUSPENSION               | 54868-5572-*0 | MEGACE   |
| MEGACE ORAL SUSPENSION             | 54868-3099-*1 | MEGACE   |
| MEGACE ES ORAL SUSPENSION          | 16590-*254-33 | MEGACE   |
| ZOLADEX KIT FOR INJECTION          | 00310-0951-30 | ZOLADEX  |
| ZOLADEX KIT FOR INJECTION          | 00310-0950-36 | ZOLADEX  |
| ZOLADEX 3 MONTH INJECTION          | 00310-0961-90 | ZOLADEX  |
| ZOLADEX IMPLANTS                   | 60440-0960-*2 | ZOLADEX  |
| ZOLADEX INJECTION                  | 60440-0961-*1 | ZOLADEX  |
| FARESTON TABLETS                   | 11399-*005-01 | FARESTON |
| FARESTON TABLETS                   | 11399-*005-30 | FARESTON |
| FARESTON TABLETS                   | 11399-*005-07 | FARESTON |
| FARESTON TABLETS                   | 52483-9429-*1 | FARESTON |
| FARESTON TABLETS                   | 54092-*170-01 | FARESTON |
| FARESTON TABLETS                   | 54092-*170-30 | FARESTON |
| FARESTON TABLETS                   | 54092-*170-07 | FARESTON |
| FASLODEX INJECTION                 | 00310-0720-10 | FASLODEX |
| FASLODEX INJECTION                 | 00310-0720-50 | FASLODEX |
| FASLODEX FULVESTRANT INJECTION KIT | 62195-*305-25 | FASLODEX |
| FASLODEX FULVESTRANT INJECTION KIT | 62195-*305-50 | FASLODEX |
| NOLVADEX TABLETS                   | 62584-*600-08 | NOLVADEX |
| NOLVADEX TABLETS                   | 66105-*832-01 | NOLVADEX |
| NOLVADEX TABLETS                   | 66105-*832-03 | NOLVADEX |
| NOLVADEX TABLETS                   | 66105-*832-06 | NOLVADEX |
| NOLVADEX TABLETS                   | 66105-*832-09 | NOLVADEX |
| NOLVADEX TABLETS                   | 66105-*832-10 | NOLVADEX |

|                           |               |           |
|---------------------------|---------------|-----------|
| NOLVADEX                  | 12581-0600-** | NOLVADEX  |
| NOLVADEX TABLET           | 00179-1299-01 | NOLVADEX  |
| NOLVADEX TABLETS          | 51129-1952-*1 | NOLVADEX  |
| TAMOXIFEN CITRATE TABLETS | 00310-0446-03 | TAMOXIFEN |
| TAMOXIFEN CITRATE TABLETS | 00555-0446-05 | TAMOXIFEN |
| TAMOXIFEN CITRATE TABLETS | 00555-0446-03 | TAMOXIFEN |
| TAMOXIFEN CITRATE TABLETS | 00555-0446-12 | TAMOXIFEN |
| TAMOXIFEN CITRATE TABLETS | 00555-0446-63 | TAMOXIFEN |
| TAMOXIFEN CITRATE TABLETS | 00555-0446-09 | TAMOXIFEN |
| TAMOXIFEN CITRATE TABLETS | 00555-0904-01 | TAMOXIFEN |
| TAMOXIFEN CITRATE TABLETS | 00555-0904-14 | TAMOXIFEN |
| TAMOXIFEN CITRATE TABLETS | 00555-0904-05 | TAMOXIFEN |
| TAMOXIFEN CITRATE TABLETS | 00555-0904-64 | TAMOXIFEN |
| TAMOXIFEN CITRATE         | 55045-2703-*0 | TAMOXIFEN |
| TAMOXIFEN CITRATE         | 55045-2703-*9 | TAMOXIFEN |
| TAMOXIFEN TABLET          | 55887-*872-90 | TAMOXIFEN |
| TAMOXIFEN TABLET          | 55887-*872-01 | TAMOXIFEN |
| TAMOXIFEN CITRATE TABLET  | 48581-6222-*1 | TAMOXIFEN |
| TAMOXIFEN CITRATE TABLET  | 48581-6222-*2 | TAMOXIFEN |
| TAMOXIFEN CITRATE TABLET  | 48581-6222-*3 | TAMOXIFEN |
| TAMOXIFEN CITRATE TABLETS | 48581-6221-*1 | TAMOXIFEN |
| TAMOXIFEN CITRATE TABLETS | 48581-6221-*2 | TAMOXIFEN |
| TAMOXIFEN CITRATE TABLETS | 48581-6221-*3 | TAMOXIFEN |
| TAMOXIFEN CITRATE TABLETS | 48581-6221-*4 | TAMOXIFEN |
| TAMOXIFEN CITRATE TABLETS | 59564-*144-01 | TAMOXIFEN |
| TAMOXIFEN CITRATE TABLETS | 59564-*144-07 | TAMOXIFEN |

|                               |               |           |
|-------------------------------|---------------|-----------|
| TAMOXIFEN CITRATE TABLETS     | 00172-5656-49 | TAMOXIFEN |
| TAMOXIFEN CITRATE TABLETS     | 00172-5656-58 | TAMOXIFEN |
| TAMOXIFEN CITRATE TABLETS     | 00172-5656-70 | TAMOXIFEN |
| TAMOXIFEN CITRATE TABLETS     | 00172-5656-80 | TAMOXIFEN |
| TAMOXIFEN CITRATE TABLETS     | 00172-5657-46 | TAMOXIFEN |
| TAMOXIFEN CITRATE TABLETS     | 00172-5657-55 | TAMOXIFEN |
| TAMOXIFEN CITRATE TABLETS     | 00172-5657-80 | TAMOXIFEN |
| TAMOXIFEN CITRATE TABLETS     | 62540-5657-*1 | TAMOXIFEN |
| TAMOXIFEN CITRATE TABLETS     | 62540-5657-*2 | TAMOXIFEN |
| TAMOXIFEN CITRATE TABLETS     | 62540-5656-*9 | TAMOXIFEN |
| TAMOXIFEN CITRATE TABLETS     | 62540-5656-*0 | TAMOXIFEN |
| TAMOXIFEN CITRATE TABLETS     | 62540-5656-*2 | TAMOXIFEN |
| TAMOXIFEN CITRATE TABLETS     | 62540-5656-*3 | TAMOXIFEN |
| TAMOXIFEN CITRATE TABLETS     | 00179-1952-01 | TAMOXIFEN |
| TAMOXIFEN CITRATE TABLETS     | 00179-1952-30 | TAMOXIFEN |
| TAMOXIFEN CITRATE TABLETS     | 00179-1952-60 | TAMOXIFEN |
| TAMOXIFEN CITRATE TABLETS     | 00179-1952-50 | TAMOXIFEN |
| TAMOXIFEN CITRATE TABLETS     | 00179-1952-90 | TAMOXIFEN |
| TAMOXIFEN CITRATE TABLETS     | 63739-*269-10 | TAMOXIFEN |
| TAMOXIFEN CITRATE TABLETS     | 51129-2622-*1 | TAMOXIFEN |
| TAMOXIFEN CITRATE TABLETS     | 51129-4662-*1 | TAMOXIFEN |
| TAMOXIFEN CITRATE TABLETS     | 51129-4662-*2 | TAMOXIFEN |
| TAMOXIFEN CITRATE TABLETS     | 51129-4218-*1 | TAMOXIFEN |
| TAMOXIFEN CITRATE TABLETS     | 51129-4218-*2 | TAMOXIFEN |
| TAMOXIFEN CITRATE TABLETS USP | 55160-*150-01 | TAMOXIFEN |
| TAMOXIFEN CITRATE TABLETS USP | 55160-*150-05 | TAMOXIFEN |

|                               |               |           |
|-------------------------------|---------------|-----------|
| TAMOXIFEN CITRATE TABLETS USP | 55160-*149-01 | TAMOXIFEN |
| TAMOXIFEN CITRATE TABLETS USP | 55160-*149-05 | TAMOXIFEN |
| TAMOXIFEN CITRATE TABLETS     | 00378-0144-91 | TAMOXIFEN |
| TAMOXIFEN CITRATE TABLETS     | 00378-0144-05 | TAMOXIFEN |
| TAMOXIFEN CITRATE TABLETS     | 00378-0274-93 | TAMOXIFEN |
| TAMOXIFEN CITRATE TABLETS     | 00378-0274-01 | TAMOXIFEN |
| TAMOXIFEN CITRATE TABLETS     | 00378-0274-25 | TAMOXIFEN |
| TAMOXIFEN CITRATE TABLETS     | 66267-*873-60 | TAMOXIFEN |
| TAMOXIFEN CITRATE TABLETS     | 53002-1032-*3 | TAMOXIFEN |
| TAMOXIFEN CITRATE TABLETS     | 53002-1032-*6 | TAMOXIFEN |
| TAMOXIFEN CITRATE TABLETS     | 54868-3004-*1 | TAMOXIFEN |
| TAMOXIFEN CITRATE TABLETS     | 54868-3004-*2 | TAMOXIFEN |
| TAMOXIFEN CITRATE TABLETS     | 54868-3004-*5 | TAMOXIFEN |
| TAMOXIFEN CITRATE TABLETS     | 54868-3004-*3 | TAMOXIFEN |
| TAMOXIFEN CITRATE TABLETS     | 54868-3004-*4 | TAMOXIFEN |
| TAMOXIFEN CITRATE TABLETS     | 54868-4287-*4 | TAMOXIFEN |
| TAMOXIFEN CITRATE TABLETS     | 54868-4287-*3 | TAMOXIFEN |
| TAMOXIFEN CITRATE TABLETS     | 54868-4287-*2 | TAMOXIFEN |
| TAMOXIFEN CITRATE TABLETS     | 54868-4287-*1 | TAMOXIFEN |
| TAMOXIFEN CITRATE TABLETS     | 54868-4287-*0 | TAMOXIFEN |
| TAMOXIFEN CITRATE TABLETS     | 63304-*601-30 | TAMOXIFEN |
| TAMOXIFEN CITRATE TABLETS     | 63304-*601-90 | TAMOXIFEN |
| TAMOXIFEN CITRATE TABLETS     | 63304-*600-60 | TAMOXIFEN |
| TAMOXIFEN CITRATE TABLETS     | 63304-*600-28 | TAMOXIFEN |
| TAMOXIFEN CITRATE TABLET      | 26053-0044-*1 | TAMOXIFEN |
| TAMOXIFEN CITRATE TABLETS     | 00480-0784-06 | TAMOXIFEN |



|                           |               |           |
|---------------------------|---------------|-----------|
| TAMOXIFEN CITRATE TABLETS | 00480-0784-86 | TAMOXIFEN |
| TAMOXIFEN CITRATE TABLETS | 00480-0784-05 | TAMOXIFEN |
| TAMOXIFEN CITRATE TABLETS | 00480-0784-10 | TAMOXIFEN |
| TAMOXIFEN CITRATE TABLETS | 00480-0782-56 | TAMOXIFEN |
| TAMOXIFEN CITRATE TABLETS | 00480-0782-01 | TAMOXIFEN |
| TAMOXIFEN CITRATE TABLETS | 00480-0782-05 | TAMOXIFEN |
| TAMOXIFEN CITRATE TABLETS | 00480-0782-10 | TAMOXIFEN |
| TAMOXIFEN CITRATE TABLETS | 00093-0784-06 | TAMOXIFEN |
| TAMOXIFEN CITRATE TABLETS | 00093-0784-86 | TAMOXIFEN |
| TAMOXIFEN CITRATE TABLETS | 00093-0784-05 | TAMOXIFEN |
| TAMOXIFEN CITRATE TABLETS | 00093-0784-10 | TAMOXIFEN |
| TAMOXIFEN CITRATE TABLETS | 00093-0782-56 | TAMOXIFEN |
| TAMOXIFEN CITRATE TABLETS | 00093-0782-01 | TAMOXIFEN |
| TAMOXIFEN CITRATE TABLETS | 00093-0782-05 | TAMOXIFEN |
| TAMOXIFEN CITRATE TABLETS | 00093-0782-10 | TAMOXIFEN |
| TAMOXIFEN CITRATE TABLETS | 00017-5657-60 | TAMOXIFEN |
| TAMOXIFEN CITRATE TABLETS | 00017-5657-70 | TAMOXIFEN |
| TAMOXIFEN CITRATE TABLETS | 00591-2233-30 | TAMOXIFEN |
| TAMOXIFEN CITRATE TABLETS | 00591-2233-19 | TAMOXIFEN |
| TAMOXIFEN CITRATE TABLETS | 00591-2232-60 | TAMOXIFEN |
| TAMOXIFEN CITRATE TABLETS | 00591-2232-18 | TAMOXIFEN |
| TAMOXIFEN CITRATE TABLETS | 62037-*964-60 | TAMOXIFEN |
| TAMOXIFEN CITRATE TABLETS | 62037-*964-18 | TAMOXIFEN |
| TAMOXIFEN CITRATE TABLETS | 62037-*964-25 | TAMOXIFEN |
